# Supplementary material for: Reliability of 3D Lower Extremity Movement Analysis by Means of Inertial Sensor Technology during Transitional Tasks
Source: PubMed Central journal article supplement (PMC6111309; doi:10.3390/s18082638), 2018-08-11
Supplement: sensors-18-02638-s001.pdf [file sensors-18-02638-s001.pdf]

Table S1: Between-session and between-operator reliability (ICC, confidence intervals) and agreement (SEM, MDC) of joint angles from walking.

|                  |            | minSW  |      |               |     | minST |      |               |     | maxSW |      |               |     | maxST |      |               |     |      |
|------------------|------------|--------|------|---------------|-----|-------|------|---------------|-----|-------|------|---------------|-----|-------|------|---------------|-----|------|
|                  |            | ICC    | CI   | SEM           | MDC | ICC   | CI   | SEM           | MDC | ICC   | CI   | SEM           | MDC | ICC   | CI   | SEM           | MDC |      |
| within-session   | frontal    | Trunk  | 0,91 | (0,84 - 0,96) | 0,1 | 0,4   | 0,88 | (0,78 - 0,95) | 0,1 | 0,4   | 0,89 | (0,8 - 0,95)  | 0,1 | 0,4   | 0,87 | (0,75 - 0,94) | 0,1 | 0,4  |
|                  |            | Pelvis | 0,90 | (0,81 - 0,96) | 0,7 | 2,0   | 0,92 | (0,84 - 0,96) | 0,6 | 1,6   | 0,79 | (0,63 - 0,9)  | 0,5 | 1,4   | 0,78 | (0,62 - 0,9)  | 0,8 | 2,3  |
|                  |            | Hip    | 0,86 | (0,74 - 0,94) | 1,1 | 3,0   | 0,77 | (0,6 - 0,9)   | 1,0 | 2,8   | 0,94 | (0,87 - 0,97) | 0,7 | 1,9   | 0,89 | (0,8 - 0,95)  | 1,1 | 3,1  |
|                  |            | Knee   | 0,97 | (0,94 - 0,99) | 1,1 | 3,0   | 0,95 | (0,9 - 0,98)  | 0,8 | 2,3   | 0,96 | (0,93 - 0,98) | 0,7 | 2,0   | 0,94 | (0,88 - 0,97) | 0,7 | 1,9  |
|                  |            | Ankle  | 0,81 | (0,66 - 0,91) | 1,9 | 5,3   | 0,80 | (0,64 - 0,91) | 2,0 | 5,5   | 0,97 | (0,94 - 0,99) | 0,9 | 2,5   | 0,88 | (0,77 - 0,95) | 1,3 | 3,6  |
|                  | transverse | Trunk  | 0,91 | (0,82 - 0,96) | 0,2 | 0,6   | 0,93 | (0,86 - 0,97) | 0,2 | 0,5   | 0,90 | (0,8 - 0,96)  | 0,2 | 0,6   | 0,91 | (0,82 - 0,96) | 0,2 | 0,6  |
|                  |            | Pelvis | 0,90 | (0,81 - 0,96) | 0,6 | 1,8   | 0,92 | (0,84 - 0,96) | 0,6 | 1,8   | 0,88 | (0,77 - 0,95) | 0,8 | 2,1   | 0,90 | (0,81 - 0,96) | 0,7 | 1,9  |
|                  |            | Hip    | 0,96 | (0,92 - 0,98) | 1,5 | 4,2   | 0,95 | (0,91 - 0,98) | 1,6 | 4,5   | 0,95 | (0,91 - 0,98) | 1,6 | 4,4   | 0,92 | (0,85 - 0,97) | 1,7 | 4,7  |
|                  |            | Knee   | 0,95 | (0,9 - 0,98)  | 1,7 | 4,7   | 0,96 | (0,91 - 0,98) | 1,5 | 4,1   | 0,95 | (0,9 - 0,98)  | 1,4 | 4,0   | 0,94 | (0,88 - 0,97) | 1,6 | 4,4  |
|                  |            | Ankle  | 0,94 | (0,86 - 0,98) | 1,6 | 4,4   | 0,91 | (0,82 - 0,96) | 1,7 | 4,7   | 0,93 | (0,86 - 0,97) | 2,7 | 7,5   | 0,86 | (0,74 - 0,94) | 2,9 | 7,9  |
|                  | sagittal   | Trunk  | 0,93 | (0,87 - 0,97) | 0,2 | 0,6   | 0,91 | (0,83 - 0,96) | 0,2 | 0,6   | 0,94 | (0,88 - 0,98) | 0,2 | 0,5   | 0,94 | (0,89 - 0,98) | 0,2 | 0,6  |
|                  |            | Pelvis | 0,93 | (0,87 - 0,97) | 0,7 | 1,8   | 0,90 | (0,82 - 0,96) | 0,7 | 1,9   | 0,94 | (0,87 - 0,97) | 0,6 | 1,8   | 0,92 | (0,85 - 0,97) | 0,6 | 1,7  |
|                  |            | Hip    | 0,92 | (0,85 - 0,97) | 1,4 | 3,8   | 0,93 | (0,85 - 0,97) | 1,2 | 3,4   | 0,92 | (0,85 - 0,97) | 1,5 | 4,0   | 0,90 | (0,81 - 0,96) | 2,1 | 5,8  |
|                  |            | Knee   | 0,92 | (0,85 - 0,97) | 1,7 | 4,8   | 0,90 | (0,81 - 0,96) | 1,7 | 4,7   | 0,94 | (0,87 - 0,97) | 1,5 | 4,1   | 0,86 | (0,74 - 0,94) | 2,3 | 6,4  |
|                  |            | Ankle  | 0,93 | (0,86 - 0,97) | 2,1 | 5,9   | 0,81 | (0,66 - 0,91) | 1,9 | 5,4   | 0,88 | (0,77 - 0,95) | 1,8 | 5,0   | 0,91 | (0,83 - 0,96) | 1,2 | 3,3  |
| between-session  | frontal    | Trunk  | 0,69 | (0,19 - 0,88) | 0,3 | 0,7   | 0,59 | (0 - 0,84)    | 0,3 | 0,8   | 0,65 | (0,12 - 0,86) | 0,3 | 0,8   | 0,65 | (0,1 - 0,86)  | 0,3 | 0,8  |
|                  |            | Pelvis | 0,68 | (0,17 - 0,87) | 1,2 | 3,4   | 0,48 | (0 - 0,8)     | 1,3 | 3,6   | 0,68 | (0,19 - 0,87) | 0,9 | 2,5   | 0,64 | (0,1 - 0,85)  | 1,3 | 3,6  |
|                  |            | Hip    | 0,55 | (0 - 0,82)    | 2,2 | 6,1   | 0,42 | (0 - 0,77)    | 1,9 | 5,4   | 0,62 | (0,01 - 0,85) | 2,1 | 6,0   | 0,49 | (0 - 0,8)     | 2,5 | 7,0  |
|                  |            | Knee   | 0,65 | (0,13 - 0,86) | 3,9 | 10,9  | 0,71 | (0,27 - 0,88) | 2,7 | 7,4   | 0,08 | (0 - 0,65)    | 3,0 | 8,3   | 0,41 | (0 - 0,76)    | 2,0 | 5,6  |
|                  |            | Ankle  | 0,76 | (0,39 - 0,91) | 2,4 | 6,7   | 0,92 | (0,79 - 0,97) | 1,6 | 4,3   | 0,91 | (0,79 - 0,97) | 1,8 | 5,0   | 0,85 | (0,62 - 0,94) | 1,5 | 4,2  |
|                  | transverse | Trunk  | 0,45 | (0 - 0,79)    | 0,5 | 1,4   | 0,49 | (0 - 0,8)     | 0,5 | 1,4   | 0,54 | (0 - 0,82)    | 0,6 | 1,6   | 0,57 | (0 - 0,83)    | 0,6 | 1,6  |
|                  |            | Pelvis | 0,48 | (0 - 0,8)     | 1,5 | 4,1   | 0,50 | (0 - 0,8)     | 1,5 | 4,1   | 0,50 | (0 - 0,8)     | 1,8 | 5,0   | 0,57 | (0 - 0,83)    | 1,7 | 4,8  |
|                  |            | Hip    | 0,02 | (0 - 0,62)    | 6,6 | 18,4  | 0,00 | (0 - 0,6)     | 6,6 | 18,2  | 0,00 | (0 - 0,39)    | 0,8 | 2,2   | 0,00 | (0 - 0,39)    | 6,7 | 18,7 |
|                  |            | Knee   | 0,88 | (0,67 - 0,95) | 3,2 | 8,7   | 0,81 | (0,53 - 0,92) | 3,4 | 9,4   | 0,85 | (0,63 - 0,94) | 3,0 | 8,3   | 0,80 | (0,5 - 0,92)  | 3,4 | 9,4  |
|                  |            | Ankle  | 0,79 | (0,46 - 0,92) | 3,3 | 9,2   | 0,70 | (0,27 - 0,88) | 3,4 | 9,4   | 0,90 | (0,75 - 0,96) | 3,8 | 10,6  | 0,85 | (0,63 - 0,94) | 3,5 | 9,6  |
|                  | sagittal   | Trunk  | 0,75 | (0,36 - 0,9)  | 0,5 | 1,4   | 0,63 | (0,05 - 0,86) | 0,6 | 1,5   | 0,82 | (0,53 - 0,93) | 0,5 | 1,4   | 0,81 | (0,5 - 0,92)  | 0,5 | 1,4  |
|                  |            | Pelvis | 0,70 | (0,22 - 0,88) | 1,7 | 4,7   | 0,62 | (0,02 - 0,85) | 1,7 | 4,7   | 0,82 | (0,53 - 0,93) | 1,5 | 4,2   | 0,80 | (0,5 - 0,92)  | 1,3 | 3,7  |
|                  |            | Hip    | 0,63 | (0,1 - 0,85)  | 3,3 | 9,0   | 0,57 | (0 - 0,83)    | 3,2 | 8,8   | 0,60 | (0,02 - 0,84) | 3,6 | 9,9   | 0,77 | (0,42 - 0,91) | 3,5 | 9,7  |
|                  |            | Knee   | 0,90 | (0,73 - 0,96) | 2,4 | 6,6   | 0,93 | (0,83 - 0,97) | 1,9 | 5,2   | 0,88 | (0,48 - 0,96) | 2,0 | 5,5   | 0,91 | (0,76 - 0,96) | 2,4 | 6,5  |
|                  |            | Ankle  | 0,94 | (0,84 - 0,97) | 2,9 | 8,0   | 0,90 | (0,74 - 0,96) | 2,1 | 5,7   | 0,92 | (0,8 - 0,97)  | 2,0 | 5,7   | 0,90 | (0,76 - 0,93) | 1,8 | 4,9  |
| between-operator | frontal    | Trunk  | 0,34 | (0 - 0,76)    | 0,4 | 1,0   | 0,16 | (0 - 0,69)    | 0,4 | 1,2   | 0,67 | (0,12 - 0,88) | 0,3 | 0,7   | 0,71 | (0 - 0,89)    | 0,3 | 0,7  |
|                  |            | Pelvis | 0,12 | (0 - 0,68)    | 1,7 | 4,8   | 0,01 | (0 - 0,64)    | 1,8 | 5,0   | 0,54 | (0 - 0,83)    | 0,9 | 2,5   | 0,25 | (0 - 0,73)    | 1,6 | 4,4  |
|                  |            | Hip    | 0,73 | (0,27 - 0,9)  | 1,9 | 5,3   | 0,44 | (0 - 0,79)    | 1,7 | 4,7   | 0,39 | (0 - 0,77)    | 2,3 | 6,3   | 0,53 | (0 - 0,83)    | 2,6 | 7,2  |
|                  |            | Knee   | 0,70 | (0,2 - 0,89)  | 4,1 | 11,3  | 0,84 | (0,56 - 0,94) | 2,4 | 6,6   | 0,55 | (0 - 0,83)    | 2,4 | 6,6   | 0,36 | (0 - 0,77)    | 1,9 | 5,3  |
|                  |            | Ankle  | 0,49 | (0 - 0,8)     | 3,2 | 8,9   | 0,65 | (0,1 - 0,87)  | 2,9 | 8,2   | 0,87 | (0,64 - 0,95) | 2,1 | 5,7   | 0,80 | (0,45 - 0,93) | 1,9 | 5,2  |
|                  | transverse | Trunk  | 0,49 | (0 - 0,81)    | 0,6 | 1,7   | 0,40 | (0 - 0,77)    | 0,7 | 1,9   | 0,44 | (0 - 0,8)     | 0,7 | 2,0   | 0,48 | (0 - 0,81)    | 0,7 | 2,0  |
|                  |            | Pelvis | 0,45 | (0 - 0,79)    | 1,8 | 5,1   | 0,40 | (0 - 0,77)    | 2,0 | 5,5   | 0,43 | (0 - 0,79)    | 2,2 | 6,2   | 0,49 | (0 - 0,81)    | 2,1 | 5,8  |
|                  |            | Hip    | 0,27 | (0 - 0,73)    | 5,8 | 16,1  | 0,30 | (0 - 0,74)    | 5,6 | 15,4  | 0,00 | (0 - 0,57)    | 6,0 | 16,8  | 0,00 | (0 - 0,18)    | 5,9 | 16,3 |
|                  |            | Knee   | 0,66 | (0,14 - 0,87) | 4,6 | 12,8  | 0,66 | (0,14 - 0,87) | 3,8 | 10,7  | 0,65 | (0,12 - 0,87) | 4,0 | 11,0  | 0,61 | (0,04 - 0,85) | 4,0 | 11,2 |
|                  |            | Ankle  | 0,79 | (0,44 - 0,92) | 3,1 | 8,6   | 0,62 | (0 - 0,86)    | 3,7 | 10,1  | 0,90 | (0,73 - 0,96) | 4,2 | 11,7  | 0,86 | (0,62 - 0,95) | 3,5 | 9,6  |
|                  | sagittal   | Trunk  | 0,60 | (0 - 0,85)    | 0,6 | 1,6   | 0,42 | (0 - 0,79)    | 0,6 | 1,7   | 0,62 | (0 - 0,86)    | 0,6 | 1,7   | 0,52 | (0 - 0,82)    | 0,7 | 2,0  |
|                  |            | Pelvis | 0,58 | (0 - 0,84)    | 1,7 | 4,8   | 0,33 | (0 - 0,76)    | 1,9 | 5,3   | 0,52 | (0 - 0,82)    | 2,0 | 5,5   | 0,44 | (0 - 0,79)    | 2,0 | 5,7  |
|                  |            | Hip    | 0,67 | (0,12 - 0,87) | 3,1 | 8,5   | 0,43 | (0 - 0,79)    | 3,3 | 9,2   | 0,79 | (0,47 - 0,92) | 3,1 | 8,7   | 0,84 | (0,59 - 0,94) | 3,4 | 9,6  |
|                  |            | Knee   | 0,84 | (0,58 - 0,94) | 3,2 | 8,9   | 0,89 | (0,71 - 0,96) | 2,2 | 6,1   | 0,90 | (0,7 - 0,96)  | 2,2 | 6,1   | 0,93 | (0,82 - 0,98) | 2,2 | 6,0  |
|                  |            | Ankle  | 0,95 | (0,86 - 0,98) | 2,3 | 6,5   | 0,81 | (0,49 - 0,93) | 2,3 | 6,4   | 0,93 | (0,82 - 0,97) | 1,7 | 4,7   | 0,93 | (0,81 - 0,97) | 1,4 | 3,9  |

Table S2: Between-session and between-operator reliability (ICC, confidence intervals) and agreement (SEM, MDC) of joint angles from forward lunge.

|                  |            | minSWon |      |               |     | minFTon |      |               |     | minSWoff |      |               |     | maxSWon |      |               |     | maxFTon |      |               |     | maxSWoff |      |               |     |      |
|------------------|------------|---------|------|---------------|-----|---------|------|---------------|-----|----------|------|---------------|-----|---------|------|---------------|-----|---------|------|---------------|-----|----------|------|---------------|-----|------|
|                  |            | ICC     | CI   | SEM           | MDC | ICC     | CI   | SEM           | MDC | ICC      | CI   | SEM           | MDC | ICC     | CI   | SEM           | MDC | ICC     | CI   | SEM           | MDC | ICC      | CI   | SEM           | MDC |      |
| within-session   | frontal    | Trunk   | 0,89 | (0,78 - 0,95) | 0,2 | 0,6     | 0,81 | (0,65 - 0,92) | 0,3 | 1,0      | 0,77 | (0,59 - 0,9)  | 0,5 | 1,4     | 0,94 | (0,88 - 0,98) | 0,1 | 0,4     | 0,83 | (0,69 - 0,93) | 0,3 | 0,9      | 0,85 | (0,71 - 0,94) | 0,4 | 1,2  |
|                  |            | Pelvis  | 0,88 | (0,77 - 0,95) | 0,6 | 1,7     | 0,78 | (0,6 - 0,91)  | 1,2 | 3,3      | 0,79 | (0,61 - 0,91) | 1,5 | 4,1     | 0,93 | (0,86 - 0,97) | 0,4 | 1,2     | 0,85 | (0,7 - 0,94)  | 1,0 | 2,9      | 0,86 | (0,72 - 0,94) | 1,2 | 3,4  |
|                  |            | Hip     | 0,96 | (0,92 - 0,98) | 1,1 | 3,0     | 0,94 | (0,87 - 0,98) | 1,8 | 5,0      | 0,90 | (0,79 - 0,96) | 2,0 | 5,7     | 0,96 | (0,91 - 0,98) | 1,0 | 2,9     | 0,92 | (0,84 - 0,97) | 1,4 | 4,0      | 0,86 | (0,73 - 0,94) | 2,0 | 5,5  |
|                  |            | Knee    | 0,96 | (0,92 - 0,99) | 1,0 | 2,8     | 0,94 | (0,88 - 0,98) | 1,4 | 3,9      | 0,92 | (0,84 - 0,97) | 1,6 | 4,6     | 0,97 | (0,93 - 0,99) | 0,6 | 1,8     | 0,88 | (0,77 - 0,95) | 1,4 | 3,9      | 0,86 | (0,74 - 0,95) | 1,1 | 3,0  |
|                  |            | Ankle   | 0,88 | (0,75 - 0,95) | 2,0 | 5,5     | 0,83 | (0,67 - 0,93) | 2,1 | 5,9      | 0,83 | (0,68 - 0,93) | 2,9 | 8,0     | 0,93 | (0,85 - 0,97) | 1,7 | 4,6     | 0,83 | (0,69 - 0,93) | 2,7 | 7,5      | 0,91 | (0,81 - 0,96) | 1,7 | 4,7  |
|                  | transverse | Trunk   | 0,98 | (0,96 - 0,99) | 0,2 | 0,5     | 0,98 | (0,95 - 0,99) | 0,2 | 0,6      | 0,94 | (0,87 - 0,97) | 0,3 | 0,8     | 0,98 | (0,96 - 0,99) | 0,1 | 0,4     | 0,94 | (0,87 - 0,98) | 0,3 | 0,8      | 0,93 | (0,85 - 0,97) | 0,3 | 0,9  |
|                  |            | Pelvis  | 0,98 | (0,97 - 0,99) | 0,5 | 1,4     | 0,97 | (0,94 - 0,99) | 0,6 | 1,8      | 0,92 | (0,84 - 0,97) | 1,0 | 2,7     | 0,98 | (0,96 - 0,99) | 0,4 | 1,2     | 0,94 | (0,87 - 0,98) | 0,8 | 2,3      | 0,92 | (0,85 - 0,97) | 0,9 | 2,6  |
|                  |            | Hip     | 0,98 | (0,96 - 0,99) | 1,4 | 4,0     | 0,97 | (0,94 - 0,99) | 1,4 | 4,0      | 0,96 | (0,91 - 0,98) | 2,0 | 5,5     | 0,97 | (0,93 - 0,99) | 1,6 | 4,5     | 0,98 | (0,96 - 0,99) | 1,4 | 3,9      | 0,98 | (0,95 - 0,99) | 1,6 | 4,5  |
|                  |            | Knee    | 0,94 | (0,87 - 0,98) | 2,2 | 6,2     | 0,93 | (0,85 - 0,97) | 2,5 | 7,0      | 0,91 | (0,81 - 0,96) | 2,4 | 6,6     | 0,97 | (0,94 - 0,99) | 1,6 | 4,6     | 0,95 | (0,91 - 0,98) | 2,1 | 5,9      | 0,97 | (0,93 - 0,99) | 1,7 | 4,7  |
|                  |            | Ankle   | 0,96 | (0,92 - 0,99) | 1,4 | 3,8     | 0,93 | (0,85 - 0,97) | 2,0 | 5,6      | 0,93 | (0,86 - 0,97) | 1,8 | 5,0     | 0,93 | (0,86 - 0,97) | 1,9 | 5,3     | 0,82 | (0,67 - 0,93) | 2,7 | 7,5      | 0,80 | (0,63 - 0,92) | 3,2 | 8,8  |
|                  | sagittal   | Trunk   | 0,97 | (0,93 - 0,99) | 0,2 | 0,5     | 0,96 | (0,92 - 0,98) | 0,2 | 0,6      | 0,97 | (0,93 - 0,99) | 0,2 | 0,6     | 0,96 | (0,92 - 0,99) | 0,2 | 0,5     | 0,96 | (0,91 - 0,98) | 0,2 | 0,6      | 0,95 | (0,9 - 0,99)  | 0,2 | 0,6  |
|                  |            | Pelvis  | 0,97 | (0,93 - 0,99) | 0,6 | 1,6     | 0,96 | (0,91 - 0,98) | 0,6 | 1,8      | 0,96 | (0,91 - 0,98) | 0,7 | 1,9     | 0,96 | (0,92 - 0,99) | 0,5 | 1,5     | 0,96 | (0,93 - 0,99) | 0,6 | 1,8      | 0,95 | (0,89 - 0,98) | 0,8 | 2,1  |
|                  |            | Hip     | 0,81 | (0,64 - 0,92) | 1,9 | 5,4     | 0,91 | (0,82 - 0,96) | 1,9 | 5,2      | 0,63 | (0,4 - 0,83)  | 3,9 | 10,9    | 0,91 | (0,82 - 0,97) | 2,3 | 6,4     | 0,95 | (0,89 - 0,98) | 1,9 | 5,2      | 0,89 | (0,78 - 0,96) | 1,9 | 5,4  |
|                  |            | Knee    | 0,95 | (0,9 - 0,98)  | 1,5 | 4,1     | 0,79 | (0,61 - 0,91) | 3,1 | 8,6      | 0,84 | (0,7 - 0,94)  | 2,5 | 7,0     | 0,90 | (0,81 - 0,96) | 3,3 | 9,0     | 0,93 | (0,85 - 0,97) | 3,6 | 10,0     | 0,89 | (0,77 - 0,95) | 4,6 | 12,9 |
|                  |            | Ankle   | 0,81 | (0,64 - 0,92) | 7,1 | 19,6    | 0,72 | (0,51 - 0,88) | 5,6 | 15,4     | 0,77 | (0,58 - 0,9)  | 7,9 | 21,9    | 0,89 | (0,79 - 0,96) | 1,8 | 5,0     | 0,94 | (0,88 - 0,98) | 2,1 | 5,8      | 0,95 | (0,91 - 0,98) | 1,4 | 3,9  |
| between-session  | frontal    | Trunk   | 0,60 | (0 - 0,84)    | 0,3 | 0,9     | 0,75 | (0,38 - 0,9)  | 0,4 | 1,1      | 0,81 | (0,53 - 0,92) | 0,5 | 1,4     | 0,45 | (0 - 0,78)    | 0,4 | 1,0     | 0,75 | (0,36 - 0,9)  | 0,5 | 1,5      | 0,73 | (0,34 - 0,89) | 0,5 | 1,5  |
|                  |            | Pelvis  | 0,61 | (0 - 0,85)    | 1,0 | 2,9     | 0,73 | (0,33 - 0,89) | 1,3 | 3,7      | 0,80 | (0,5 - 0,92)  | 1,5 | 4,3     | 0,43 | (0 - 0,78)    | 1,1 | 3,0     | 0,69 | (0,2 - 0,88)  | 1,6 | 4,5      | 0,75 | (0,38 - 0,89) | 1,6 | 4,4  |
|                  |            | Hip     | 0,72 | (0,3 - 0,89)  | 3,3 | 9,2     | 0,75 | (0,38 - 0,9)  | 5,2 | 14,5     | 0,79 | (0,46 - 0,92) | 3,0 | 8,5     | 0,75 | (0,37 - 0,9)  | 3,9 | 10,7    | 0,71 | (0,25 - 0,88) | 4,4 | 12,3     | 0,68 | (0,19 - 0,87) | 4,6 | 12,9 |
|                  |            | Knee    | 0,54 | (0 - 0,82)    | 5,0 | 13,8    | 0,64 | (0,1 - 0,86)  | 5,3 | 14,7     | 0,61 | (0,02 - 0,85) | 5,0 | 13,9    | 0,82 | (0,56 - 0,93) | 2,1 | 5,8     | 0,58 | (0 - 0,83)    | 3,0 | 8,5      | 0,37 | (0 - 0,75)    | 2,5 | 6,8  |
|                  |            | Ankle   | 0,62 | (0,09 - 0,85) | 3,6 | 10,1    | 0,71 | (0,27 - 0,88) | 3,2 | 8,9      | 0,65 | (0,09 - 0,86) | 5,0 | 13,9    | 0,92 | (0,75 - 0,97) | 2,0 | 5,5     | 0,93 | (0,82 - 0,97) | 2,3 | 6,3      | 0,88 | (0,65 - 0,96) | 1,9 | 5,4  |
|                  | transverse | Trunk   | 0,29 | (0 - 0,72)    | 0,9 | 2,6     | 0,11 | (0 - 0,64)    | 0,9 | 2,4      | 0,00 | (0 - 0,49)    | 0,9 | 2,5     | 0,00 | (0 - 0,49)    | 0,8 | 2,3     | 0,14 | (0 - 0,65)    | 0,8 | 2,3      | 0,00 | (0 - 0,58)    | 0,8 | 2,3  |
|                  |            | Pelvis  | 0,30 | (0 - 0,72)    | 2,8 | 7,7     | 0,00 | (0 - 0,59)    | 2,7 | 7,4      | 0,00 | (0 - 0,44)    | 2,7 | 7,4     | 0,00 | (0 - 0,48)    | 2,5 | 7,1     | 0,15 | (0 - 0,65)    | 2,5 | 6,9      | 0,00 | (0 - 0,58)    | 2,5 | 6,8  |
|                  |            | Hip     | 0,00 | (0 - 0,51)    | 9,0 | 25,0    | 0,00 | (0 - 0,31)    | 8,2 | 22,7     | 0,00 | (0 - 0,44)    | 8,3 | 22,9    | 0,00 | (0 - 0,21)    | 8,8 | 24,3    | 0,00 | (0 - 0,43)    | 8,2 | 22,7     | 0,00 | (0 - 0,5)     | 8,3 | 22,9 |
|                  |            | Knee    | 0,72 | (0,29 - 0,89) | 5,1 | 14,2    | 0,80 | (0,5 - 0,92)  | 5,0 | 13,9     | 0,78 | (0,43 - 0,91) | 4,4 | 12,2    | 0,70 | (0,23 - 0,88) | 5,3 | 14,8    | 0,84 | (0,6 - 0,94)  | 5,0 | 13,8     | 0,81 | (0,51 - 0,92) | 4,7 | 12,9 |
|                  |            | Ankle   | 0,12 | (0 - 0,64)    | 7,1 | 19,6    | 0,11 | (0 - 0,59)    | 7,6 | 21,1     | 0,28 | (0 - 0,71)    | 7,4 | 20,5    | 0,09 | (0 - 0,59)    | 6,5 | 18,0    | 0,31 | (0 - 0,71)    | 5,9 | 16,3     | 0,49 | (0 - 0,79)    | 6,7 | 18,7 |
|                  | sagittal   | Trunk   | 0,75 | (0,38 - 0,9)  | 0,5 | 1,5     | 0,70 | (0,23 - 0,88) | 0,7 | 1,8      | 0,75 | (0,37 - 0,9)  | 0,6 | 1,7     | 0,79 | (0,48 - 0,92) | 0,5 | 1,5     | 0,71 | (0,27 - 0,88) | 0,7 | 2,0      | 0,65 | (0,11 - 0,86) | 0,7 | 2,0  |
|                  |            | Pelvis  | 0,76 | (0,39 - 0,9)  | 1,6 | 4,6     | 0,67 | (0,16 - 0,87) | 2,0 | 5,7      | 0,75 | (0,36 - 0,9)  | 1,8 | 5,1     | 0,79 | (0,48 - 0,92) | 1,6 | 4,4     | 0,67 | (0,19 - 0,87) | 2,3 | 6,4      | 0,61 | (0 - 0,85)    | 2,2 | 6,1  |
|                  |            | Hip     | 0,63 | (0,09 - 0,85) | 3,9 | 10,8    | 0,63 | (0,09 - 0,85) | 4,1 | 11,3     | 0,71 | (0,29 - 0,88) | 4,0 | 11,1    | 0,85 | (0,64 - 0,94) | 3,6 | 9,9     | 0,68 | (0,2 - 0,87)  | 7,3 | 20,2     | 0,75 | (0,38 - 0,9)  | 3,7 | 10,2 |
|                  |            | Knee    | 0,90 | (0,74 - 0,96) | 2,7 | 7,5     | 0,82 | (0,5 - 0,93)  | 3,1 | 8,7      | 0,86 | (0,65 - 0,95) | 2,6 | 7,3     | 0,95 | (0,77 - 0,98) | 2,3 | 6,4     | 0,90 | (0,75 - 0,96) | 5,9 | 16,4     | 0,94 | (0,83 - 0,98) | 4,0 | 11,1 |
|                  |            | Ankle   | 0,87 | (0,61 - 0,95) | 6,6 | 18,4    | 0,83 | (0,57 - 0,93) | 5,4 | 15,0     | 0,81 | (0,51 - 0,92) | 9,2 | 25,4    | 0,93 | (0,83 - 0,97) | 2,0 | 5,6     | 0,93 | (0,82 - 0,97) | 2,9 | 8,2      | 0,93 | (0,82 - 0,97) | 2,6 | 7,3  |
| between-operator | frontal    | Trunk   | 0,68 | (0,21 - 0,87) | 0,4 | 1,0     | 0,60 | (0 - 0,84)    | 0,5 | 1,4      | 0,62 | (0,09 - 0,85) | 0,6 | 1,6     | 0,62 | (0,02 - 0,85) | 0,4 | 1,1     | 0,62 | (0,02 - 0,85) | 0,7 | 1,8      | 0,73 | (0,31 - 0,89) | 0,5 | 1,5  |
|                  |            | Pelvis  | 0,66 | (0,14 - 0,87) | 1,2 | 3,2     | 0,58 | (0 - 0,83)    | 1,5 | 4,2      | 0,61 | (0,04 - 0,84) | 1,8 | 5,1     | 0,61 | (0 - 0,85)    | 1,3 | 3,5     | 0,61 | (0 - 0,85)    | 1,9 | 5,3      | 0,72 | (0,29 - 0,89) | 1,7 | 4,7  |
|                  |            | Hip     | 0,82 | (0,53 - 0,93) | 3,0 | 8,5     | 0,79 | (0,46 - 0,91) | 5,1 | 14,2     | 0,81 | (0,53 - 0,93) | 3,1 | 8,5     | 0,86 | (0,63 - 0,94) | 3,5 | 9,8     | 0,79 | (0,47 - 0,92) | 4,0 | 11,2     | 0,83 | (0,58 - 0,93) | 3,6 | 10,1 |
|                  |            | Knee    | 0,75 | (0,36 - 0,9)  | 3,4 | 9,5     | 0,76 | (0,41 - 0,9)  | 4,3 | 11,9     | 0,66 | (0,13 - 0,87) | 4,5 | 12,5    | 0,70 | (0,22 - 0,88) | 2,4 | 6,7     | 0,44 | (0 - 0,78)    | 3,1 | 8,7      | 0,14 | (0 - 0,67)    | 2,8 | 7,7  |
|                  |            | Ankle   | 0,77 | (0,44 - 0,91) | 3,1 | 8,7     | 0,59 | (0 - 0,84)    | 4,1 | 11,3     | 0,49 | (0 - 0,79)    | 5,2 | 14,3    | 0,97 | (0,81 - 0,97) | 2,1 | 5,9     | 0,93 | (0,83 - 0,97) | 2,3 | 6,3      | 0,85 | (0,63 - 0,94) | 2,4 | 6,6  |
|                  | transverse | Trunk   | 0,31 | (0 - 0,73)    | 0,9 | 2,6     | 0,33 | (0 - 0,74)    | 1,0 | 2,7      | 0,11 | (0 - 0,66)    | 1,0 | 2,7     | 0,00 | (0 - 0,57)    | 0,9 | 2,5     | 0,50 | (0 - 0,8)     | 0,8 | 2,4      | 0,30 | (0 - 0,73)    | 0,9 | 2,5  |
|                  |            | Pelvis  | 0,32 | (0 - 0,73)    | 2,8 | 7,9     | 0,33 | (0 - 0,74)    | 2,9 | 8,0      | 0,08 | (0 - 0,64)    | 2,9 | 8,0     | 0,00 | (0 - 0,57)    | 2,8 | 7,6     | 0,49 | (0 - 0,8)     | 2,6 | 7,1      | 0,29 | (0 - 0,72)    | 2,7 | 7,4  |
|                  |            | Hip     | 0,82 | (0,53 - 0,93) | 6,0 | 16,6    | 0,74 | (0,33 - 0,9)  | 6,3 | 17,4     | 0,78 | (0,44 - 0,91) | 6,0 | 16,7    | 0,75 | (0,36 - 0,9)  | 5,4 | 15,1    | 0,78 | (0,44 - 0,91) | 5,8 | 16,2     | 0,80 | (0,49 - 0,92) | 5,4 | 14,9 |
|                  |            | Knee    | 0,69 | (0,23 - 0,88) | 5,4 | 15,0    | 0,71 | (0,29 - 0,88) | 5,3 | 14,7     | 0,65 | (0,17 - 0,86) | 5,1 | 14,2    | 0,70 | (0,25 - 0,88) | 5,3 | 14,6    | 0,78 | (0,45 - 0,91) | 5,7 | 15,8     | 0,81 | (0,53 - 0,92) | 4,7 | 13,0 |
|                  |            | Ankle   | 0,57 | (0 - 0,83)    | 5,5 | 15,2    | 0,69 | (0,25 - 0,88) | 5,1 | 14,0     | 0,61 | (0,01 - 0,85) | 5,3 | 14,7    | 0,65 | (0,12 - 0,86) | 4,9 | 13,7    | 0,54 | (0 - 0,82)    | 5,2 | 14,5     | 0,68 | (0,18 - 0,88) | 5,2 | 14,3 |
|                  | sagittal   | Trunk   | 0,29 | (0 - 0,72)    | 1,1 | 3,0     | 0,38 | (0 - 0,75)    | 1,1 | 3,2      | 0,41 | (0 - 0,76)    | 1,1 | 3,2     | 0,42 | (0 - 0,77)    | 1,0 | 2,8     | 0,28 | (0 - 0,7)     | 1,2 | 3,3      | 0,42 | (0 - 0,76)    | 1,0 | 2,9  |
|                  |            | Pelvis  | 0,29 | (0 - 0,72)    | 3,3 | 9,2     | 0,39 | (0 - 0,75)    | 3,4 | 9,6      | 0,39 | (0 - 0,75)    | 3,5 | 9,6     | 0,42 | (0 - 0,76)    | 3,0 | 8,3     | 0,26 | (0 - 0,69)    | 3,6 | 10,0     | 0,38 | (0 - 0,75)    | 3,2 | 8,9  |
|                  |            | Hip     | 0,48 | (0 - 0,79)    | 5,7 | 15,9    | 0,08 | (0 - 0,63)    | 6,4 | 17,6     | 0,66 | (0,16 - 0,86) | 5,9 | 16,4    | 0,40 | (0 - 0,76)    | 6,6 | 18,3    | 0,65 | (0,13 - 0,86) | 8,3 | 22,9     | 0,51 | (0 - 0,8)     | 6,0 | 16,6 |
|                  |            | Knee    | 0,90 | (0,75 - 0,96) | 3,2 | 8,9     | 0,84 |               |     |          |      |               |     |         |      |               |     |         |      |               |     |          |      |               |     |      |

Table S3: Between-session and between-operator reliability (ICC, confidence intervals) and agreement (SEM, MDC) of joint angles from sideward lunge.

|                  |            | minSWon |      |               | minFTon |      |      | minSWoff      |     |      | maxSWon |               |     | maxFTon |        |               | maxSWoff |      |      |               |     |      |      |               |     |      |
|------------------|------------|---------|------|---------------|---------|------|------|---------------|-----|------|---------|---------------|-----|---------|--------|---------------|----------|------|------|---------------|-----|------|------|---------------|-----|------|
|                  |            | ICC     | CI   | SEM           | MDC     | ICC  | CI   | SEM           | MDC | ICC  | CI      | SEM           | MDC | ICC     | CI     | SEM           | MDC      | ICC  | CI   | SEM           | MDC |      |      |               |     |      |
| within-session   | frontal    | Trunk   | 0,90 | (0,82 - 0,96) | 0,2     | 0,6  | 0,88 | (0,78 - 0,95) | 0,2 | 0,7  | 0,63    | (0,42 - 0,81) | 0,3 | 0,9     | 0,91   | (0,84 - 0,96) | 0,2      | 0,5  | 0,87 | (0,76 - 0,94) | 0,3 | 0,7  | 0,83 | (0,7 - 0,92)  | 0,3 | 0,7  |
|                  |            | Pelvis  | 0,91 | (0,83 - 0,96) | 0,6     | 1,6  | 0,88 | (0,78 - 0,95) | 0,7 | 2,0  | 0,67    | (0,47 - 0,84) | 0,9 | 2,6     | 0,91   | (0,83 - 0,96) | 0,6      | 1,7  | 0,86 | (0,74 - 0,93) | 0,8 | 2,2  | 0,84 | (0,71 - 0,93) | 0,8 | 2,2  |
|                  |            | Hip     | 0,87 | (0,76 - 0,94) | 1,7     | 4,8  | 0,89 | (0,79 - 0,95) | 3,2 | 8,8  | 0,90    | (0,82 - 0,96) | 1,6 | 4,3     | 0,94   | (0,88 - 0,97) | 1,2      | 3,3  | 0,91 | (0,83 - 0,96) | 1,5 | 4,1  | 0,92 | (0,85 - 0,97) | 1,3 | 3,7  |
|                  |            | Knee    | 0,89 | (0,79 - 0,95) | 1,8     | 4,9  | 0,96 | (0,92 - 0,98) | 1,1 | 3,1  | 0,91    | (0,84 - 0,96) | 1,3 | 3,7     | 0,90   | (0,82 - 0,96) | 0,9      | 2,5  | 0,97 | (0,94 - 0,99) | 1,0 | 2,7  | 0,93 | (0,87 - 0,97) | 0,8 | 2,3  |
|                  |            | Ankle   | 0,83 | (0,7 - 0,92)  | 1,8     | 5,0  | 0,92 | (0,86 - 0,97) | 1,5 | 4,1  | 0,90    | (0,8 - 0,95)  | 1,9 | 5,2     | 0,85   | (0,73 - 0,93) | 2,1      | 5,7  | 0,94 | (0,88 - 0,97) | 1,7 | 4,6  | 0,78 | (0,62 - 0,9)  | 2,2 | 6,1  |
|                  | transverse | Trunk   | 0,92 | (0,83 - 0,97) | 0,2     | 0,6  | 0,86 | (0,72 - 0,94) | 0,3 | 0,8  | 0,85    | (0,7 - 0,94)  | 0,3 | 0,7     | 0,92   | (0,83 - 0,97) | 0,2      | 0,6  | 0,84 | (0,64 - 0,93) | 0,3 | 0,7  | 0,87 | (0,72 - 0,95) | 0,2 | 0,7  |
|                  |            | Pelvis  | 0,92 | (0,81 - 0,97) | 0,7     | 1,9  | 0,86 | (0,73 - 0,94) | 0,9 | 2,4  | 0,86    | (0,72 - 0,94) | 0,8 | 2,2     | 0,92   | (0,84 - 0,97) | 0,7      | 1,9  | 0,83 | (0,64 - 0,93) | 0,8 | 2,2  | 0,87 | (0,7 - 0,95)  | 0,7 | 2,0  |
|                  |            | Hip     | 0,92 | (0,85 - 0,96) | 1,9     | 5,3  | 0,94 | (0,89 - 0,98) | 1,8 | 4,9  | 0,91    | (0,84 - 0,96) | 2,3 | 6,5     | 0,86   | (0,74 - 0,93) | 2,0      | 5,7  | 0,87 | (0,76 - 0,94) | 2,2 | 6,1  | 0,88 | (0,77 - 0,95) | 2,0 | 5,6  |
|                  |            | Knee    | 0,97 | (0,95 - 0,99) | 1,3     | 3,5  | 0,93 | (0,87 - 0,97) | 1,6 | 4,5  | 0,94    | (0,89 - 0,98) | 1,7 | 4,7     | 0,89   | (0,79 - 0,95) | 3,1      | 8,5  | 0,97 | (0,94 - 0,99) | 1,2 | 3,4  | 0,94 | (0,89 - 0,98) | 1,8 | 4,9  |
|                  |            | Ankle   | 0,90 | (0,82 - 0,96) | 2,0     | 5,6  | 0,91 | (0,84 - 0,96) | 1,4 | 4,0  | 0,92    | (0,85 - 0,96) | 1,9 | 5,4     | 0,94   | (0,89 - 0,98) | 1,9      | 5,2  | 0,93 | (0,86 - 0,1)  | 2,0 | 5,7  | 0,94 | (0,89 - 0,98) | 1,9 | 5,2  |
|                  | sagittal   | Trunk   | 0,95 | (0,9 - 0,98)  | 0,2     | 0,6  | 0,96 | (0,93 - 0,98) | 0,2 | 0,6  | 0,94    | (0,89 - 0,97) | 0,2 | 0,6     | 0,93   | (0,87 - 0,97) | 0,2      | 0,5  | 0,94 | (0,88 - 0,97) | 0,3 | 0,7  | 0,93 | (0,86 - 0,97) | 0,2 | 0,5  |
|                  |            | Pelvis  | 0,94 | (0,89 - 0,98) | 0,6     | 1,7  | 0,96 | (0,92 - 0,98) | 0,6 | 1,8  | 0,93    | (0,87 - 0,97) | 0,7 | 2,0     | 0,93   | (0,87 - 0,97) | 0,5      | 1,5  | 0,93 | (0,87 - 0,97) | 0,8 | 2,2  | 0,94 | (0,88 - 0,97) | 0,6 | 1,5  |
|                  |            | Hip     | 0,78 | (0,62 - 0,9)  | 2,5     | 7,0  | 0,89 | (0,8 - 0,95)  | 2,3 | 6,4  | 0,87    | (0,76 - 0,94) | 2,1 | 5,9     | 0,85   | (0,72 - 0,93) | 3,9      | 10,8 | 0,95 | (0,91 - 0,98) | 2,9 | 8,0  | 0,93 | (0,86 - 0,97) | 2,1 | 5,9  |
|                  |            | Knee    | 0,91 | (0,84 - 0,96) | 2,1     | 5,7  | 0,83 | (0,7 - 0,92)  | 2,5 | 6,8  | 0,86    | (0,74 - 0,94) | 2,2 | 6,1     | 0,83   | (0,69 - 0,92) | 8,3      | 23,1 | 0,95 | (0,9 - 0,98)  | 2,4 | 6,5  | 0,90 | (0,82 - 0,96) | 4,2 | 11,5 |
|                  |            | Ankle   | 0,89 | (0,79 - 0,95) | 2,0     | 5,6  | 0,73 | (0,55 - 0,87) | 3,2 | 8,9  | 0,79    | (0,64 - 0,9)  | 3,1 | 8,6     | 0,94   | (0,89 - 0,98) | 1,7      | 4,8  | 0,97 | (0,95 - 0,99) | 1,2 | 3,4  | 0,94 | (0,88 - 0,97) | 1,6 | 4,6  |
| between-session  | frontal    | Trunk   | 0,82 | (0,57 - 0,93) | 0,3     | 0,9  | 0,86 | (0,64 - 0,94) | 0,4 | 1,0  | 0,10    | (0 - 0,65)    | 0,5 | 1,3     | 0,70   | (0,23 - 0,88) | 0,4      | 1,1  | 0,83 | (0,55 - 0,93) | 0,4 | 1,2  | 0,32 | (0 - 0,74)    | 0,5 | 1,3  |
|                  |            | Pelvis  | 0,82 | (0,55 - 0,93) | 1,0     | 2,8  | 0,85 | (0,63 - 0,94) | 1,1 | 3,0  | 0,01    | (0 - 0,62)    | 1,5 | 4,1     | 0,70   | (0,22 - 0,88) | 1,2      | 3,3  | 0,83 | (0,56 - 0,93) | 1,3 | 3,6  | 0,31 | (0 - 0,73)    | 1,5 | 4,1  |
|                  |            | Hip     | 0,57 | (0 - 0,83)    | 3,0     | 8,2  | 0,77 | (0,3 - 0,89)  | 6,1 | 17,0 | 0,56    | (0 - 0,83)    | 3,2 | 8,9     | 0,33   | (0 - 0,74)    | 3,6      | 10,0 | 0,55 | (0 - 0,82)    | 3,6 | 10,1 | 0,53 | (0 - 0,82)    | 3,3 | 9,3  |
|                  |            | Knee    | 0,77 | (0,41 - 0,91) | 3,2     | 8,9  | 0,83 | (0,57 - 0,93) | 3,2 | 8,7  | 0,59    | (0 - 0,84)    | 3,7 | 10,2    | 0,68   | (0,2 - 0,88)  | 2,0      | 5,7  | 0,78 | (0,42 - 0,91) | 3,4 | 9,5  | 0,71 | (0,28 - 0,89) | 2,1 | 5,8  |
|                  |            | Ankle   | 0,58 | (0 - 0,83)    | 4,8     | 13,2 | 0,69 | (0,2 - 0,88)  | 3,4 | 9,5  | 0,62    | (0,03 - 0,85) | 4,2 | 11,5    | 0,90   | (0,76 - 0,96) | 2,1      | 5,8  | 0,93 | (0,83 - 0,97) | 2,6 | 7,2  | 0,90 | (0,61 - 0,97) | 1,5 | 4,1  |
|                  | transverse | Trunk   | 0,58 | (0 - 0,84)    | 0,6     | 1,8  | 0,51 | (0 - 0,81)    | 0,6 | 1,7  | 0,19    | (0 - 0,69)    | 0,6 | 1,8     | 0,49   | (0 - 0,8)     | 0,6      | 1,7  | 0,53 | (0 - 0,82)    | 0,6 | 1,8  | 0,31 | (0 - 0,73)    | 0,6 | 1,8  |
|                  |            | Pelvis  | 0,58 | (0 - 0,84)    | 1,9     | 5,4  | 0,53 | (0 - 0,82)    | 1,8 | 5,1  | 0,21    | (0 - 0,7)     | 1,9 | 5,4     | 0,49   | (0 - 0,8)     | 1,9      | 5,2  | 0,47 | (0 - 0,79)    | 2,0 | 5,5  | 0,23 | (0 - 0,7)     | 2,0 | 5,5  |
|                  |            | Hip     | 0,00 | (0 - 0,47)    | 7,0     | 19,4 | 0,07 | (0 - 0,64)    | 7,0 | 19,4 | 0,00    | (0 - 0,55)    | 7,5 | 20,7    | 0,00   | (0 - 0,41)    | 6,4      | 17,7 | 0,07 | (0 - 0,64)    | 6,7 | 18,5 | 0,00 | (0 - 0,43)    | 6,6 | 18,2 |
|                  |            | Knee    | 0,80 | (0,5 - 0,92)  | 5,0     | 13,9 | 0,83 | (0,57 - 0,93) | 3,9 | 10,8 | 0,80    | (0,5 - 0,92)  | 4,8 | 13,3    | 0,84   | (0,59 - 0,94) | 4,6      | 12,9 | 0,86 | (0,64 - 0,94) | 4,2 | 11,6 | 0,85 | (0,61 - 0,94) | 4,3 | 11,9 |
|                  |            | Ankle   | 0,13 | (0 - 0,67)    | 9,2     | 25,4 | 0,20 | (0 - 0,69)    | 8,9 | 24,7 | 0,22    | (0 - 0,7)     | 9,0 | 25,0    | 0,00   | (0 - 0,55)    | 8,4      | 23,2 | 0,23 | (0 - 0,7)     | 8,6 | 23,8 | 0,32 | (0 - 0,74)    | 8,1 | 22,4 |
|                  | sagittal   | Trunk   | 0,52 | (0 - 0,81)    | 0,7     | 1,9  | 0,68 | (0,22 - 0,87) | 0,8 | 2,2  | 0,58    | (0 - 0,83)    | 0,8 | 2,2     | 0,46   | (0 - 0,79)    | 0,7      | 2,1  | 0,70 | (0,27 - 0,88) | 0,7 | 2,1  | 0,40 | (0 - 0,76)    | 0,8 | 2,2  |
|                  |            | Pelvis  | 0,52 | (0 - 0,81)    | 2,0     | 5,6  | 0,67 | (0,19 - 0,87) | 2,4 | 6,6  | 0,56    | (0 - 0,83)    | 2,4 | 6,5     | 0,49   | (0 - 0,8)     | 2,2      | 6,2  | 0,69 | (0,25 - 0,88) | 2,3 | 6,3  | 0,42 | (0 - 0,77)    | 2,4 | 6,6  |
|                  |            | Hip     | 0,77 | (0,43 - 0,91) | 3,3     | 9,1  | 0,72 | (0,29 - 0,89) | 4,3 | 12,1 | 0,72    | (0,31 - 0,89) | 3,9 | 10,9    | 0,76   | (0,41 - 0,9)  | 4,9      | 13,7 | 0,92 | (0,79 - 0,97) | 4,9 | 13,6 | 0,80 | (0,49 - 0,92) | 4,5 | 12,4 |
|                  |            | Knee    | 0,91 | (0,77 - 0,96) | 2,8     | 7,7  | 0,75 | (0,34 - 0,9)  | 4,3 | 11,9 | 0,79    | (0,47 - 0,92) | 3,1 | 8,5     | 0,85   | (0,61 - 0,94) | 8,0      | 22,2 | 0,94 | (0,85 - 0,98) | 3,6 | 10,1 | 0,96 | (0,91 - 0,99) | 3,5 | 9,7  |
|                  |            | Ankle   | 0,79 | (0,47 - 0,92) | 4,1     | 11,4 | 0,77 | (0,41 - 0,91) | 4,2 | 11,6 | 0,77    | (0,43 - 0,91) | 4,3 | 12,0    | 0,90   | (0,75 - 0,96) | 2,9      | 8,0  | 0,94 | (0,79 - 0,98) | 2,3 | 6,3  | 0,94 | (0,86 - 0,98) | 2,3 | 6,4  |
| between-operator | frontal    | Trunk   | 0,81 | (0,51 - 0,93) | 0,4     | 1,0  | 0,85 | (0,62 - 0,95) | 0,4 | 1,1  | 0,45    | (0 - 0,8)     | 0,5 | 1,3     | 0,75   | (0,34 - 0,91) | 0,4      | 1,1  | 0,86 | (0,63 - 0,95) | 0,4 | 1,1  | 0,70 | (0,19 - 0,89) | 0,4 | 1,1  |
|                  |            | Pelvis  | 0,81 | (0,5 - 0,93)  | 1,1     | 3,0  | 0,84 | (0,57 - 0,94) | 1,2 | 3,3  | 0,42    | (0 - 0,79)    | 1,4 | 3,9     | 0,76   | (0,36 - 0,91) | 1,1      | 3,2  | 0,86 | (0,64 - 0,95) | 1,2 | 3,2  | 0,70 | (0,18 - 0,89) | 1,2 | 3,3  |
|                  |            | Hip     | 0,77 | (0,4 - 0,91)  | 2,7     | 7,6  | 0,81 | (0,5 - 0,93)  | 5,0 | 13,9 | 0,75    | (0,35 - 0,91) | 2,8 | 7,8     | 0,38   | (0 - 0,77)    | 3,6      | 9,9  | 0,54 | (0 - 0,83)    | 3,8 | 10,5 | 0,36 | (0 - 0,76)    | 4,2 | 11,5 |
|                  |            | Knee    | 0,84 | (0,56 - 0,94) | 2,8     | 7,8  | 0,88 | (0,69 - 0,96) | 2,7 | 7,4  | 0,83    | (0,54 - 0,94) | 2,5 | 7,0     | 0,82   | (0,52 - 0,93) | 1,6      | 4,4  | 0,85 | (0,59 - 0,94) | 2,7 | 7,4  | 0,73 | (0,25 - 0,9)  | 1,9 | 5,4  |
|                  |            | Ankle   | 0,63 | (0 - 0,86)    | 3,2     | 8,9  | 0,80 | (0,47 - 0,93) | 2,8 | 7,7  | 0,77    | (0,37 - 0,91) | 2,9 | 8,1     | 0,82   | (0,51 - 0,93) | 2,8      | 7,7  | 0,91 | (0,76 - 0,97) | 3,1 | 8,5  | 0,87 | (0,65 - 0,95) | 2,1 | 5,8  |
|                  | transverse | Trunk   | 0,46 | (0 - 0,8)     | 0,7     | 2,0  | 0,31 | (0 - 0,74)    | 0,7 | 2,0  | 0,09    | (0 - 0,67)    | 0,8 | 2,2     | 0,30   | (0 - 0,74)    | 0,8      | 2,1  | 0,44 | (0 - 0,79)    | 0,8 | 2,1  | 0,00 | (0 - 0,62)    | 0,8 | 2,4  |
|                  |            | Pelvis  | 0,47 | (0 - 0,8)     | 2,2     | 6,1  | 0,32 | (0 - 0,75)    | 2,2 | 6,2  | 0,08    | (0 - 0,66)    | 2,4 | 6,7     | 0,31   | (0 - 0,74)    | 2,3      | 6,4  | 0,37 | (0 - 0,77)    | 2,4 | 6,6  | 0,00 | (0 - 0,62)    | 2,5 | 7,1  |
|                  |            | Hip     | 0,63 | (0 - 0,86)    | 4,9     | 13,5 | 0,63 | (0 - 0,86)    | 5,4 | 14,9 | 0,59    | (0 - 0,85)    | 5,4 | 15,1    | 0,13   | (0 - 0,68)    | 5,6      | 15,5 | 0,46 | (0 - 0,8)     | 5,5 | 15,4 | 0,38 | (0 - 0,77)    | 5,6 | 15,6 |
|                  |            | Knee    | 0,74 | (0,32 - 0,9)  | 4,3     | 11,9 | 0,64 | (0,09 - 0,86) | 4,2 | 11,6 | 0,61    | (0,04 - 0,85) | 4,8 | 13,4    | 0,73   | (0,29 - 0,9)  | 5,1      | 14,0 | 0,73 | (0,31 - 0,9)  | 4,9 | 13,5 | 0,76 | (0,37 - 0,91) | 4,3 | 12,0 |
|                  |            | Ankle   | 0,63 | (0 - 0,86)    | 4,5     | 12,5 | 0,65 | (0,1 - 0,87)  | 3,7 | 10,4 | 0,75    | (0,33 - 0,91) | 4,0 | 11,0    | 0,72   | (0,23 - 0,9)  | 4,7      | 13,0 | 0,77 | (0,38 - 0,92) | 4,4 | 12,1 | 0,75 | (0,31 - 0,91) | 4,9 | 13,7 |
|                  | sagittal   | Trunk   | 0,36 | (0 - 0,76)    | 0,7     | 2,1  | 0,42 | (0 - 0,79)    | 0,9 | 2,6  | 0,24    | (0 - 0,72)    | 0,8 | 2,2     | 0,58   | (0 - 0,84)    | 0,6      | 1,6  | 0,33 | (0 - 0,74)    | 1,0 | 2,7  | 0,26 | (0 - 0,73)    | 0,7 | 1,9  |
|                  |            | Pelvis  | 0,33 | (0 - 0,75)    | 2,2     | 6,2  | 0,41 | (0 - 0,78)    | 2,8 | 7,8  | 0,25    | (0 - 0,73)    | 2,4 | 6,6     | 0,60   | (0 - 0,85)    | 1,7      | 4,8  | 0,31 | (0 - 0,73)    | 2,9 | 8,0  | 0,25 | (0 - 0,73)    | 2,1 | 5,8  |
|                  |            | Hip     | 0,46 | (0 - 0,8)     | 4,5     | 12,5 | 0,24 | (0 - 0,71)    | 6,8 | 18,9 | 0,43    | (0 - 0,79)    | 5,4 | 15,0    | 0,58   | (0 - 0,84)    | 6,3      | 17,5 | 0,63 | (0,05 - 0,86) | 9,8 | 27,2 | 0,63 | (0,03 - 0,86) | 6,5 | 18,0 |
|                  |            | Knee    | 0,93 | (0,81 - 0,97) | 3,0     | 8,2  | 0,88 | (0,68 - 0,95) | 2,8 | 7,8  | 0,89    | (0,71 - 0,96) | 2,6 | 7,3     | 0,85</ |               |          |      |      |               |     |      |      |               |     |      |

Table S4: Between-session and between-operator reliability (ICC, confidence intervals) and agreement (SEM, MDC) of joint angles from upstairs.

|                  |            | minSW  |      |               |      | minST |      |               |      | maxSW |      |               |     | maxST |      |               |      |      |
|------------------|------------|--------|------|---------------|------|-------|------|---------------|------|-------|------|---------------|-----|-------|------|---------------|------|------|
|                  |            | ICC    | CI   | SEM           | MDC  | ICC   | CI   | SEM           | MDC  | ICC   | CI   | SEM           | MDC | ICC   | CI   | SEM           | MDC  |      |
| within-session   | frontal    | Trunk  | 0,88 | (0,77 - 0,95) | 0,2  | 0,5   | 0,87 | (0,74 - 0,95) | 0,2  | 0,5   | 0,88 | (0,77 - 0,95) | 0,3 | 0,7   | 0,88 | (0,77 - 0,95) | 0,2  | 0,6  |
|                  |            | Pelvis | 0,92 | (0,83 - 0,97) | 0,8  | 2,1   | 0,85 | (0,71 - 0,94) | 0,7  | 2,1   | 0,88 | (0,76 - 0,95) | 0,8 | 2,3   | 0,82 | (0,66 - 0,93) | 1,4  | 3,8  |
|                  |            | Hip    | 0,93 | (0,86 - 0,97) | 1,6  | 4,4   | 0,95 | (0,9 - 0,98)  | 1,3  | 3,6   | 0,95 | (0,9 - 0,98)  | 1,1 | 3,2   | 0,92 | (0,84 - 0,97) | 1,6  | 4,4  |
|                  |            | Knee   | 0,98 | (0,96 - 0,99) | 1,2  | 3,4   | 0,98 | (0,96 - 0,99) | 1,0  | 2,8   | 0,94 | (0,88 - 0,98) | 0,8 | 2,3   | 0,96 | (0,92 - 0,99) | 0,6  | 1,6  |
|                  |            | Ankle  | 0,93 | (0,85 - 0,97) | 2,0  | 5,5   | 0,90 | (0,8 - 0,96)  | 2,0  | 5,6   | 0,92 | (0,83 - 0,97) | 2,2 | 6,0   | 0,89 | (0,78 - 0,96) | 1,7  | 4,8  |
|                  | transverse | Trunk  | 0,94 | (0,87 - 0,98) | 0,2  | 0,4   | 0,93 | (0,85 - 0,98) | 0,2  | 0,4   | 0,91 | (0,82 - 0,97) | 0,2 | 0,6   | 0,91 | (0,8 - 0,96)  | 0,2  | 0,5  |
|                  |            | Pelvis | 0,95 | (0,89 - 0,98) | 0,5  | 1,3   | 0,93 | (0,85 - 0,97) | 0,5  | 1,4   | 0,91 | (0,81 - 0,96) | 0,6 | 1,8   | 0,92 | (0,84 - 0,97) | 0,6  | 1,7  |
|                  |            | Hip    | 0,90 | (0,78 - 0,96) | 1,8  | 4,9   | 0,92 | (0,83 - 0,97) | 1,8  | 5,0   | 0,90 | (0,81 - 0,96) | 1,5 | 4,1   | 0,91 | (0,82 - 0,97) | 1,4  | 3,8  |
|                  |            | Knee   | 0,92 | (0,84 - 0,97) | 1,6  | 4,5   | 0,97 | (0,93 - 0,99) | 1,1  | 3,0   | 0,97 | (0,94 - 0,99) | 1,3 | 3,6   | 0,97 | (0,93 - 0,99) | 1,1  | 3,1  |
|                  |            | Ankle  | 0,96 | (0,91 - 0,98) | 1,7  | 4,6   | 0,95 | (0,89 - 0,98) | 1,9  | 5,3   | 0,93 | (0,85 - 0,97) | 2,1 | 5,7   | 0,92 | (0,84 - 0,97) | 2,3  | 6,4  |
|                  | sagittal   | Trunk  | 0,96 | (0,91 - 0,98) | 0,1  | 0,4   | 0,94 | (0,88 - 0,98) | 0,2  | 0,4   | 0,97 | (0,94 - 0,99) | 0,2 | 0,5   | 0,98 | (0,96 - 0,99) | 0,1  | 0,4  |
|                  |            | Pelvis | 0,95 | (0,89 - 0,98) | 0,4  | 1,2   | 0,94 | (0,87 - 0,98) | 0,5  | 1,4   | 0,97 | (0,94 - 0,99) | 0,5 | 1,3   | 0,92 | (0,85 - 0,97) | 0,9  | 2,6  |
|                  |            | Hip    | 0,93 | (0,86 - 0,97) | 1,5  | 4,2   | 0,94 | (0,88 - 0,98) | 1,3  | 3,7   | 0,97 | (0,95 - 0,99) | 1,2 | 3,5   | 0,98 | (0,96 - 0,99) | 1,2  | 3,3  |
|                  |            | Knee   | 0,91 | (0,82 - 0,97) | 2,2  | 6,1   | 0,96 | (0,91 - 0,98) | 1,4  | 3,9   | 0,96 | (0,91 - 0,98) | 1,7 | 4,6   | 0,96 | (0,93 - 0,99) | 1,3  | 3,7  |
|                  |            | Ankle  | 0,69 | (0,47 - 0,86) | 2,9  | 8,2   | 0,55 | (0,31 - 0,79) | 3,3  | 9,1   | 0,96 | (0,92 - 0,99) | 1,4 | 3,8   | 0,96 | (0,92 - 0,99) | 1,1  | 3,0  |
| between-session  | frontal    | Trunk  | 0,60 | (0,05 - 0,84) | 1,6  | 4,5   | 0,60 | (0,05 - 0,84) | 0,5  | 1,3   | 0,69 | (0,2 - 0,88)  | 0,4 | 1,1   | 0,47 | (0 - 0,79)    | 0,4  | 1,0  |
|                  |            | Pelvis | 0,67 | (0,18 - 0,87) | 3,4  | 9,5   | 0,58 | (0 - 0,83)    | 1,7  | 4,6   | 0,67 | (0,14 - 0,87) | 1,3 | 3,5   | 0,14 | (0 - 0,66)    | 2,0  | 5,5  |
|                  |            | Hip    | 0,78 | (0,44 - 0,91) | 6,0  | 16,7  | 0,78 | (0,42 - 0,91) | 3,3  | 9,3   | 0,62 | (0,03 - 0,85) | 3,3 | 9,0   | 0,68 | (0,19 - 0,87) | 3,4  | 9,4  |
|                  |            | Knee   | 0,68 | (0,21 - 0,87) | 6,5  | 17,9  | 0,68 | (0,17 - 0,87) | 5,1  | 14,2  | 0,40 | (0 - 0,77)    | 4,1 | 11,3  | 0,27 | (0 - 0,71)    | 2,9  | 8,2  |
|                  |            | Ankle  | 0,41 | (0 - 0,79)    | 0,7  | 1,9   | 0,39 | (0 - 0,76)    | 5,6  | 15,4  | 0,59 | (0 - 0,84)    | 5,0 | 13,9  | 0,82 | (0,56 - 0,93) | 2,5  | 6,9  |
|                  | transverse | Trunk  | 0,20 | (0 - 0,69)    | 0,7  | 1,9   | 0,18 | (0 - 0,68)    | 0,7  | 1,9   | 0,00 | (0 - 0,57)    | 0,7 | 1,9   | 0,28 | (0 - 0,71)    | 0,6  | 1,7  |
|                  |            | Pelvis | 0,20 | (0 - 0,69)    | 2,0  | 5,6   | 0,25 | (0 - 0,71)    | 1,9  | 5,2   | 0,03 | (0 - 0,62)    | 2,0 | 5,6   | 0,30 | (0 - 0,72)    | 2,0  | 5,4  |
|                  |            | Hip    | 0,14 | (0 - 0,66)    | 5,9  | 16,4  | 0,00 | (0 - 0,53)    | 6,4  | 17,7  | 0,00 | (0 - 0,53)    | 6,1 | 16,9  | 0,00 | (0 - 0,58)    | 5,9  | 16,5 |
|                  |            | Knee   | 0,72 | (0,32 - 0,89) | 4,1  | 11,4  | 0,60 | (0,06 - 0,84) | 5,2  | 14,4  | 0,85 | (0,62 - 0,94) | 4,4 | 12,1  | 0,65 | (0,15 - 0,86) | 4,8  | 13,3 |
|                  |            | Ankle  | 0,52 | (0 - 0,81)    | 9,3  | 25,7  | 0,10 | (0 - 0,65)    | 12,6 | 34,9  | 0,62 | (0,01 - 0,85) | 7,6 | 21,1  | 0,44 | (0 - 0,78)    | 10,2 | 28,2 |
|                  | sagittal   | Trunk  | 0,00 | (0 - 0,6)     | 0,8  | 2,2   | 0,15 | (0 - 0,67)    | 0,7  | 2,0   | 0,05 | (0 - 0,63)    | 0,9 | 2,4   | 0,13 | (0 - 0,66)    | 0,9  | 2,5  |
|                  |            | Pelvis | 0,06 | (0 - 0,64)    | 2,3  | 6,5   | 0,27 | (0 - 0,71)    | 2,1  | 5,7   | 0,10 | (0 - 0,65)    | 2,5 | 7,1   | 0,13 | (0 - 0,66)    | 2,7  | 7,5  |
|                  |            | Hip    | 0,06 | (0 - 0,63)    | 6,3  | 17,4  | 0,00 | (0 - 0,51)    | 6,7  | 18,5  | 0,21 | (0 - 0,69)    | 7,6 | 21,1  | 0,24 | (0 - 0,7)     | 7,8  | 21,6 |
|                  |            | Knee   | 0,92 | (0,8 - 0,97)  | 2,6  | 7,1   | 0,91 | (0,77 - 0,97) | 2,5  | 6,8   | 0,84 | (0,4 - 0,95)  | 3,7 | 10,4  | 0,86 | (0,42 - 0,95) | 3,1  | 8,7  |
|                  |            | Ankle  | 0,82 | (0,55 - 0,93) | 4,0  | 11,0  | 0,78 | (0,45 - 0,91) | 4,0  | 11,0  | 0,89 | (0,73 - 0,96) | 3,2 | 9,0   | 0,89 | (0,72 - 0,96) | 2,3  | 6,4  |
| between-operator | frontal    | Trunk  | 0,48 | (0 - 0,79)    | 0,6  | 1,7   | 0,47 | (0 - 0,79)    | 0,6  | 1,8   | 0,69 | (0,21 - 0,88) | 0,5 | 1,4   | 0,40 | (0 - 0,77)    | 0,5  | 1,5  |
|                  |            | Pelvis | 0,57 | (0 - 0,83)    | 2,0  | 5,6   | 0,57 | (0 - 0,83)    | 1,8  | 5,0   | 0,71 | (0,24 - 0,88) | 1,5 | 4,2   | 0,33 | (0 - 0,74)    | 2,3  | 6,5  |
|                  |            | Hip    | 0,64 | (0,07 - 0,86) | 4,0  | 11,1  | 0,81 | (0,5 - 0,92)  | 3,4  | 9,5   | 0,61 | (0 - 0,85)    | 4,1 | 11,5  | 0,68 | (0,19 - 0,87) | 4,3  | 11,8 |
|                  |            | Knee   | 0,69 | (0,2 - 0,88)  | 5,2  | 14,5  | 0,70 | (0,26 - 0,88) | 4,4  | 12,2  | 0,47 | (0 - 0,79)    | 3,6 | 10,0  | 0,53 | (0 - 0,82)    | 2,8  | 7,8  |
|                  |            | Ankle  | 0,09 | (0 - 0,64)    | 7,5  | 20,7  | 0,14 | (0 - 0,67)    | 5,7  | 15,7  | 0,64 | (0,15 - 0,86) | 4,0 | 11,1  | 0,89 | (0,73 - 0,96) | 1,9  | 5,2  |
|                  | transverse | Trunk  | 0,00 | (0 - 0,58)    | 0,9  | 2,4   | 0,00 | (0 - 0,59)    | 0,8  | 2,3   | 0,00 | (0 - 0,09)    | 0,9 | 2,4   | 0,00 | (0 - 0,37)    | 0,9  | 2,4  |
|                  |            | Pelvis | 0,00 | (0 - 0,48)    | 2,7  | 7,4   | 0,00 | (0 - 0,52)    | 2,4  | 6,8   | 0,00 | (0 - 0,17)    | 2,7 | 7,5   | 0,00 | (0 - 0,49)    | 2,6  | 7,2  |
|                  |            | Hip    | 0,32 | (0 - 0,73)    | 5,4  | 14,9  | 0,49 | (0 - 0,8)     | 5,3  | 14,7  | 0,52 | (0 - 0,81)    | 4,6 | 12,6  | 0,52 | (0 - 0,81)    | 4,7  | 12,9 |
|                  |            | Knee   | 0,36 | (0 - 0,75)    | 5,5  | 15,3  | 0,42 | (0 - 0,77)    | 5,4  | 15,0  | 0,56 | (0 - 0,83)    | 6,1 | 17,0  | 0,62 | (0,03 - 0,85) | 5,1  | 14,1 |
|                  |            | Ankle  | 0,08 | (0 - 0,64)    | 11,4 | 31,7  | 0,00 | (0 - 0,41)    | 13,5 | 37,5  | 0,30 | (0 - 0,72)    | 9,4 | 26,0  | 0,05 | (0 - 0,61)    | 12,1 | 33,6 |
|                  | sagittal   | Trunk  | 0,28 | (0 - 0,71)    | 1,1  | 2,9   | 0,33 | (0 - 0,73)    | 1,0  | 2,9   | 0,25 | (0 - 0,7)     | 1,1 | 3,0   | 0,27 | (0 - 0,71)    | 1,1  | 3,0  |
|                  |            | Pelvis | 0,28 | (0 - 0,72)    | 3,1  | 8,7   | 0,34 | (0 - 0,74)    | 3,1  | 8,5   | 0,18 | (0 - 0,68)    | 3,3 | 9,3   | 0,13 | (0 - 0,65)    | 3,4  | 9,4  |
|                  |            | Hip    | 0,33 | (0 - 0,74)    | 7,0  | 19,3  | 0,31 | (0 - 0,73)    | 7,0  | 19,5  | 0,51 | (0 - 0,81)    | 7,7 | 21,4  | 0,42 | (0 - 0,77)    | 8,0  | 22,2 |
|                  |            | Knee   | 0,87 | (0,67 - 0,95) | 3,0  | 8,3   | 0,88 | (0,7 - 0,95)  | 3,0  | 8,3   | 0,88 | (0,7 - 0,95)  | 3,9 | 10,8  | 0,80 | (0,5 - 0,92)  | 4,5  | 12,4 |
|                  |            | Ankle  | 0,77 | (0,43 - 0,91) | 4,9  | 13,7  | 0,71 | (0,3 - 0,88)  | 4,3  | 12,0  | 0,89 | (0,71 - 0,96) | 3,2 | 8,9   | 0,89 | (0,72 - 0,96) | 2,1  | 5,7  |

Table S5: Between-session and between-operator reliability (ICC, confidence intervals) and agreement (SEM, MDC) of joint angles from downstairs.

|                  |            | minSW  |      |               |      | minST |      |               |      | maxSW |      |               |      | maxST |      |               |      |      |
|------------------|------------|--------|------|---------------|------|-------|------|---------------|------|-------|------|---------------|------|-------|------|---------------|------|------|
|                  |            | ICC    | CI   | SEM           | MDC  | ICC   | CI   | SEM           | MDC  | ICC   | CI   | SEM           | MDC  | ICC   | CI   | SEM           | MDC  |      |
| within-session   | frontal    | Trunk  | 0,93 | (0,86 - 0,97) | 0,2  | 0,5   | 0,93 | (0,87 - 0,97) | 0,2  | 0,5   | 0,91 | (0,83 - 0,96) | 0,2  | 0,6   | 0,90 | (0,81 - 0,96) | 0,2  | 0,5  |
|                  |            | Pelvis | 0,80 | (0,64 - 0,91) | 0,9  | 2,4   | 0,93 | (0,86 - 0,97) | 0,7  | 1,9   | 0,88 | (0,78 - 0,95) | 0,7  | 2,0   | 0,74 | (0,56 - 0,88) | 0,9  | 2,5  |
|                  |            | Hip    | 0,91 | (0,82 - 0,96) | 1,8  | 5,1   | 0,92 | (0,84 - 0,97) | 1,4  | 3,9   | 0,90 | (0,81 - 0,96) | 1,6  | 4,4   | 0,87 | (0,76 - 0,94) | 1,8  | 5,1  |
|                  |            | Knee   | 0,93 | (0,86 - 0,97) | 1,6  | 4,4   | 0,92 | (0,84 - 0,97) | 1,2  | 3,3   | 0,95 | (0,9 - 0,98)  | 0,9  | 2,5   | 0,96 | (0,91 - 0,98) | 0,8  | 2,3  |
|                  |            | Ankle  | 0,94 | (0,88 - 0,97) | 1,5  | 4,2   | 0,92 | (0,85 - 0,97) | 1,6  | 4,4   | 0,92 | (0,85 - 0,97) | 1,9  | 5,3   | 0,85 | (0,72 - 0,93) | 1,7  | 4,8  |
|                  | transverse | Trunk  | 0,90 | (0,8 - 0,96)  | 0,2  | 0,5   | 0,83 | (0,7 - 0,92)  | 0,3  | 0,7   | 0,89 | (0,79 - 0,95) | 0,2  | 0,6   | 0,89 | (0,79 - 0,95) | 0,2  | 0,5  |
|                  |            | Pelvis | 0,74 | (0,56 - 0,88) | 1,0  | 2,8   | 0,77 | (0,61 - 0,89) | 1,1  | 3,0   | 0,87 | (0,75 - 0,94) | 0,7  | 1,8   | 0,76 | (0,59 - 0,89) | 1,0  | 2,8  |
|                  |            | Hip    | 0,87 | (0,75 - 0,94) | 2,1  | 5,9   | 0,91 | (0,82 - 3,7)  | 1,9  | 5,3   | 0,92 | (0,84 - 0,96) | 1,8  | 4,9   | 0,85 | (0,7 - 0,94)  | 2,0  | 5,5  |
|                  |            | Knee   | 0,93 | (0,87 - 0,97) | 1,9  | 5,3   | 0,92 | (0,86 - 0,97) | 2,0  | 5,5   | 0,96 | (0,93 - 0,98) | 1,2  | 3,4   | 0,96 | (0,91 - 0,98) | 1,3  | 3,6  |
|                  |            | Ankle  | 0,94 | (0,89 - 0,98) | 2,1  | 5,8   | 0,95 | (0,9 - 0,98)  | 2,3  | 6,4   | 0,96 | (0,92 - 0,98) | 2,0  | 5,4   | 0,96 | (0,92 - 0,98) | 2,0  | 5,7  |
|                  | sagittal   | Trunk  | 0,92 | (0,84 - 0,96) | 0,2  | 0,5   | 0,87 | (0,75 - 0,94) | 0,2  | 0,7   | 0,91 | (0,82 - 0,96) | 0,2  | 0,6   | 0,93 | (0,87 - 0,97) | 0,2  | 0,5  |
|                  |            | Pelvis | 0,83 | (0,69 - 0,92) | 0,9  | 2,4   | 0,92 | (0,84 - 0,97) | 0,7  | 1,9   | 0,88 | (0,78 - 0,95) | 0,7  | 1,9   | 0,87 | (0,76 - 0,94) | 0,9  | 2,4  |
|                  |            | Hip    | 0,91 | (0,83 - 0,96) | 1,7  | 4,7   | 0,85 | (0,72 - 0,93) | 2,3  | 6,3   | 0,92 | (0,84 - 0,97) | 2,1  | 5,7   | 0,91 | (0,83 - 0,96) | 1,8  | 4,9  |
|                  |            | Knee   | 0,93 | (0,86 - 0,97) | 1,6  | 4,4   | 0,93 | (0,86 - 0,97) | 1,3  | 3,7   | 0,92 | (0,84 - 0,96) | 2,1  | 5,9   | 0,63 | (0,42 - 0,82) | 3,5  | 9,8  |
|                  |            | Ankle  | 0,87 | (0,75 - 0,94) | 1,8  | 4,9   | 0,78 | (0,62 - 0,9)  | 2,8  | 7,8   | 0,92 | (0,84 - 0,96) | 2,9  | 8,1   | 0,96 | (0,92 - 0,98) | 1,7  | 4,6  |
| between-session  | frontal    | Trunk  | 0,68 | (0,24 - 0,87) | 0,4  | 1,1   | 0,68 | (0,24 - 0,87) | 0,4  | 1,2   | 0,75 | (0,35 - 0,9)  | 0,4  | 1,0   | 0,67 | (0,16 - 0,87) | 0,4  | 1,1  |
|                  |            | Pelvis | 0,70 | (0,25 - 0,88) | 1,1  | 3,2   | 0,47 | (0 - 0,79)    | 1,8  | 5,0   | 0,57 | (0 - 0,83)    | 1,3  | 3,5   | 0,40 | (0 - 0,75)    | 1,3  | 3,7  |
|                  |            | Hip    | 0,71 | (0,26 - 0,89) | 3,4  | 9,5   | 0,79 | (0,48 - 0,92) | 0,9  | 2,4   | 0,75 | (0,37 - 0,9)  | 2,8  | 7,9   | 0,72 | (0,29 - 0,89) | 3,1  | 8,5  |
|                  |            | Knee   | 0,69 | (0,23 - 0,88) | 5,3  | 14,6  | 0,56 | (0 - 0,82)    | 4,7  | 12,9  | 0,24 | (0 - 0,7)     | 3,9  | 10,8  | 0,23 | (0 - 0,7)     | 3,6  | 10,1 |
|                  |            | Ankle  | 0,59 | (0 - 0,83)    | 4,6  | 12,8  | 0,58 | (0 - 0,83)    | 4,3  | 11,8  | 0,53 | (0 - 0,82)    | 5,8  | 16,2  | 0,84 | (0,57 - 0,94) | 2,4  | 6,7  |
|                  | transverse | Trunk  | 0,00 | (0 - 0,58)    | 0,6  | 1,6   | 0,16 | (0 - 0,67)    | 0,6  | 1,6   | 0,15 | (0 - 0,67)    | 0,6  | 1,6   | 0,30 | (0 - 0,72)    | 0,5  | 1,5  |
|                  |            | Pelvis | 0,25 | (0 - 0,71)    | 1,9  | 5,4   | 0,24 | (0 - 0,7)     | 2,0  | 5,7   | 0,22 | (0 - 0,69)    | 1,8  | 4,9   | 0,00 | (0 - 0,53)    | 1,9  | 5,2  |
|                  |            | Hip    | 0,00 | (0 - 0,55)    | 6,1  | 16,8  | 0,01 | (0 - 0,62)    | 5,8  | 16,0  | 0,02 | (0 - 0,63)    | 5,9  | 16,3  | 0,00 | (0 - 0,51)    | 0,9  | 2,5  |
|                  |            | Knee   | 0,76 | (0,4 - 0,9)   | 4,7  | 13,1  | 0,65 | (0,16 - 0,86) | 4,8  | 13,3  | 0,79 | (0,49 - 0,92) | 3,9  | 10,7  | 0,64 | (0,14 - 0,86) | 4,2  | 11,7 |
|                  |            | Ankle  | 0,51 | (0 - 0,81)    | 8,3  | 22,9  | 0,26 | (0 - 0,71)    | 10,7 | 29,7  | 0,56 | (0 - 0,83)    | 8,5  | 23,5  | 0,57 | (0 - 0,83)    | 8,9  | 24,6 |
|                  | sagittal   | Trunk  | 0,18 | (0 - 0,68)    | 0,8  | 2,3   | 0,11 | (0 - 0,66)    | 0,8  | 2,3   | 0,18 | (0 - 0,68)    | 0,9  | 2,4   | 0,24 | (0 - 0,71)    | 0,9  | 2,6  |
|                  |            | Pelvis | 0,19 | (0 - 0,69)    | 2,7  | 7,4   | 0,26 | (0 - 0,71)    | 3,0  | 8,3   | 0,27 | (0 - 0,72)    | 2,4  | 6,7   | 0,22 | (0 - 0,7)     | 2,7  | 7,5  |
|                  |            | Hip    | 0,22 | (0 - 0,69)    | 6,6  | 18,3  | 0,00 | (0 - 0,58)    | 6,9  | 19,0  | 0,46 | (0 - 0,78)    | 6,6  | 18,4  | 0,14 | (0 - 0,66)    | 6,7  | 18,6 |
|                  |            | Knee   | 0,90 | (0,62 - 0,97) | 2,2  | 6,2   | 0,89 | (0,6 - 0,96)  | 2,2  | 6,0   | 0,87 | (0,36 - 0,96) | 2,8  | 7,7   | 0,74 | (0,38 - 0,9)  | 3,9  | 10,9 |
|                  |            | Ankle  | 0,80 | (0,47 - 0,92) | 3,5  | 9,8   | 0,78 | (0,43 - 0,91) | 4,0  | 11,1  | 0,96 | (0,9 - 0,99)  | 2,5  | 6,9   | 0,96 | (0,91 - 0,99) | 2,3  | 6,4  |
| between-operator | frontal    | Trunk  | 0,70 | (0,27 - 0,88) | 0,5  | 1,4   | 0,70 | (0,27 - 0,88) | 0,5  | 1,5   | 0,71 | (0,26 - 0,89) | 0,5  | 1,4   | 0,65 | (0,11 - 0,86) | 0,5  | 1,4  |
|                  |            | Pelvis | 0,72 | (0,3 - 0,89)  | 1,5  | 4,0   | 0,48 | (0 - 0,8)     | 2,1  | 5,9   | 0,67 | (0,15 - 0,87) | 1,6  | 4,4   | 0,50 | (0 - 0,8)     | 1,5  | 4,1  |
|                  |            | Hip    | 0,79 | (0,47 - 0,92) | 3,7  | 10,3  | 0,79 | (0,47 - 0,92) | 3,8  | 10,4  | 0,75 | (0,34 - 0,9)  | 3,7  | 10,3  | 0,78 | (0,43 - 0,91) | 3,6  | 10,1 |
|                  |            | Knee   | 0,77 | (0,4 - 0,91)  | 4,2  | 11,7  | 0,76 | (0,39 - 0,91) | 3,3  | 9,2   | 0,35 | (0 - 0,74)    | 3,5  | 9,8   | 0,62 | (0,02 - 0,85) | 3,2  | 9,0  |
|                  |            | Ankle  | 0,09 | (0 - 0,62)    | 6,3  | 17,5  | 0,17 | (0 - 0,66)    | 6,9  | 19,2  | 0,21 | (0 - 0,68)    | 7,2  | 19,8  | 0,77 | (0,44 - 0,91) | 2,6  | 7,3  |
|                  | transverse | Trunk  | 0,01 | (0 - 0,61)    | 0,7  | 2,0   | 0,00 | (0 - 0,52)    | 0,8  | 2,2   | 0,11 | (0 - 0,65)    | 0,7  | 1,9   | 0,05 | (0 - 0,62)    | 0,7  | 2,0  |
|                  |            | Pelvis | 0,33 | (0 - 0,74)    | 2,2  | 6,1   | 0,31 | (0 - 0,73)    | 2,4  | 6,8   | 0,21 | (0 - 0,68)    | 2,0  | 5,6   | 0,19 | (0 - 0,67)    | 2,5  | 6,9  |
|                  |            | Hip    | 0,48 | (0 - 0,8)     | 4,2  | 11,5  | 0,64 | (0,05 - 0,86) | 3,9  | 10,8  | 0,43 | (0 - 0,78)    | 4,3  | 12,0  | 0,20 | (0 - 0,69)    | 4,5  | 12,6 |
|                  |            | Knee   | 0,63 | (0,08 - 0,85) | 5,0  | 13,9  | 0,57 | (0 - 0,83)    | 5,1  | 14,0  | 0,50 | (0 - 0,81)    | 5,8  | 16,0  | 0,55 | (0 - 0,82)    | 4,8  | 13,4 |
|                  |            | Ankle  | 0,00 | (0 - 0,41)    | 11,4 | 31,6  | 0,00 | (0 - 0,33)    | 12,8 | 35,4  | 0,08 | (0 - 0,62)    | 10,5 | 29,1  | 0,00 | (0 - 0,54)    | 11,8 | 32,7 |
|                  | sagittal   | Trunk  | 0,41 | (0 - 0,77)    | 1,0  | 2,9   | 0,35 | (0 - 0,74)    | 1,1  | 3,1   | 0,36 | (0 - 0,75)    | 1,0  | 2,8   | 0,36 | (0 - 0,75)    | 1,1  | 2,9  |
|                  |            | Pelvis | 0,35 | (0 - 0,74)    | 3,3  | 9,2   | 0,33 | (0 - 0,74)    | 3,6  | 10,1  | 0,31 | (0 - 0,73)    | 3,1  | 8,5   | 0,36 | (0 - 0,75)    | 3,1  | 8,6  |
|                  |            | Hip    | 0,11 | (0 - 0,66)    | 6,7  | 18,5  | 0,08 | (0 - 0,65)    | 6,7  | 18,6  | 0,53 | (0 - 0,82)    | 7,2  | 20,1  | 0,00 | (0 - 0,59)    | 7,0  | 19,4 |
|                  |            | Knee   | 0,81 | (0,52 - 0,92) | 3,8  | 10,4  | 0,76 | (0,42 - 0,91) | 3,9  | 10,7  | 0,83 | (0,58 - 0,93) | 3,9  | 10,8  | 0,79 | (0,47 - 0,91) | 3,6  | 9,8  |
|                  |            | Ankle  | 0,70 | (0,27 - 0,88) | 4,9  | 13,5  | 0,57 | (0 - 0,83)    | 4,6  | 12,9  | 0,91 | (0,77 - 0,96) | 4,2  | 11,6  | 0,95 | (0,88 - 0,98) | 2,6  | 7,2  |

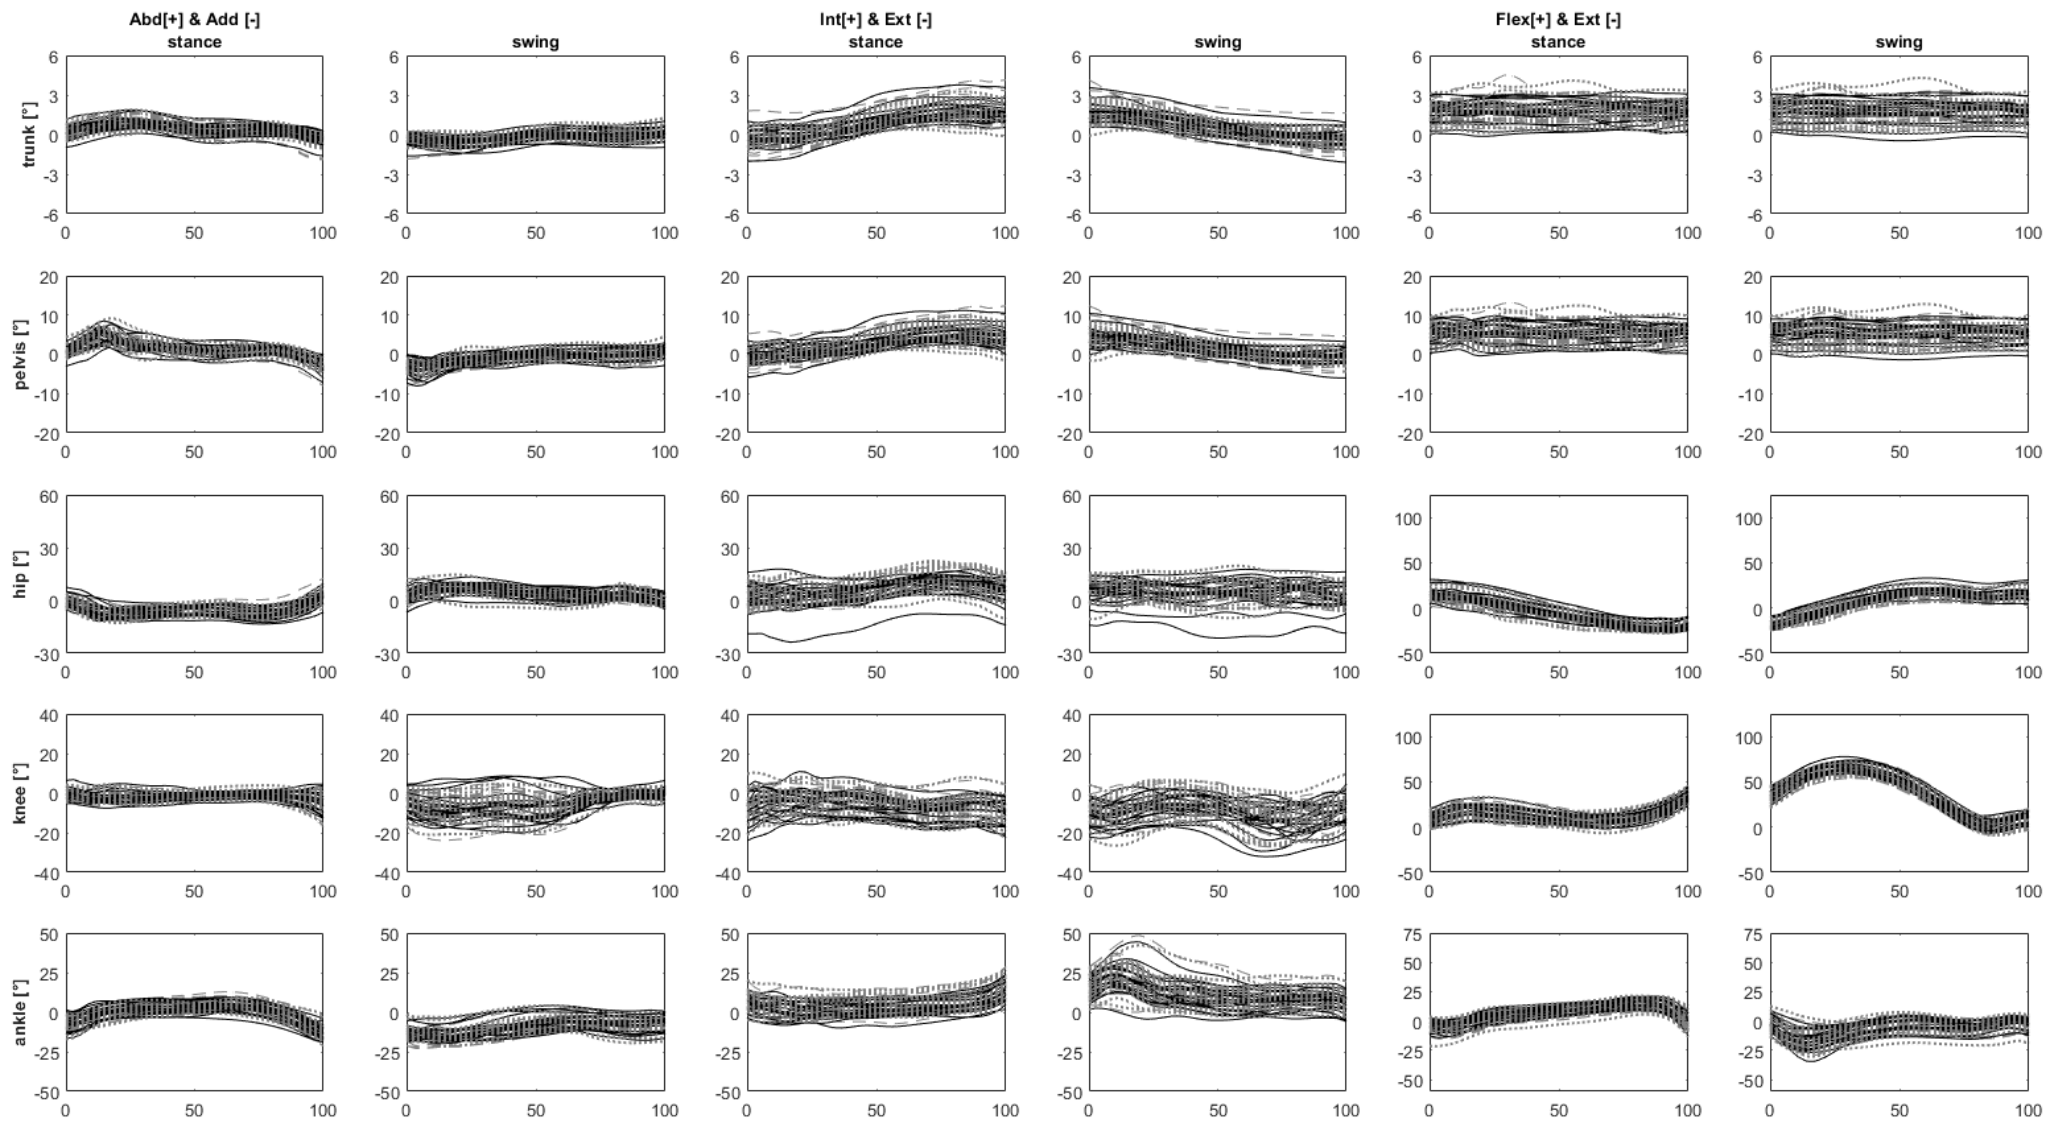

Figure S6: Waveforms of the walking task of all participants (n=20) from the trunk, pelvis, hip, knee and ankle, abd-adduction, int-external rotation and flexion-extension angles during swing and stance phases, from the three sessions: day1-operator1 (solid); day1-operator2 (striped); day2-operator1 (dotted).

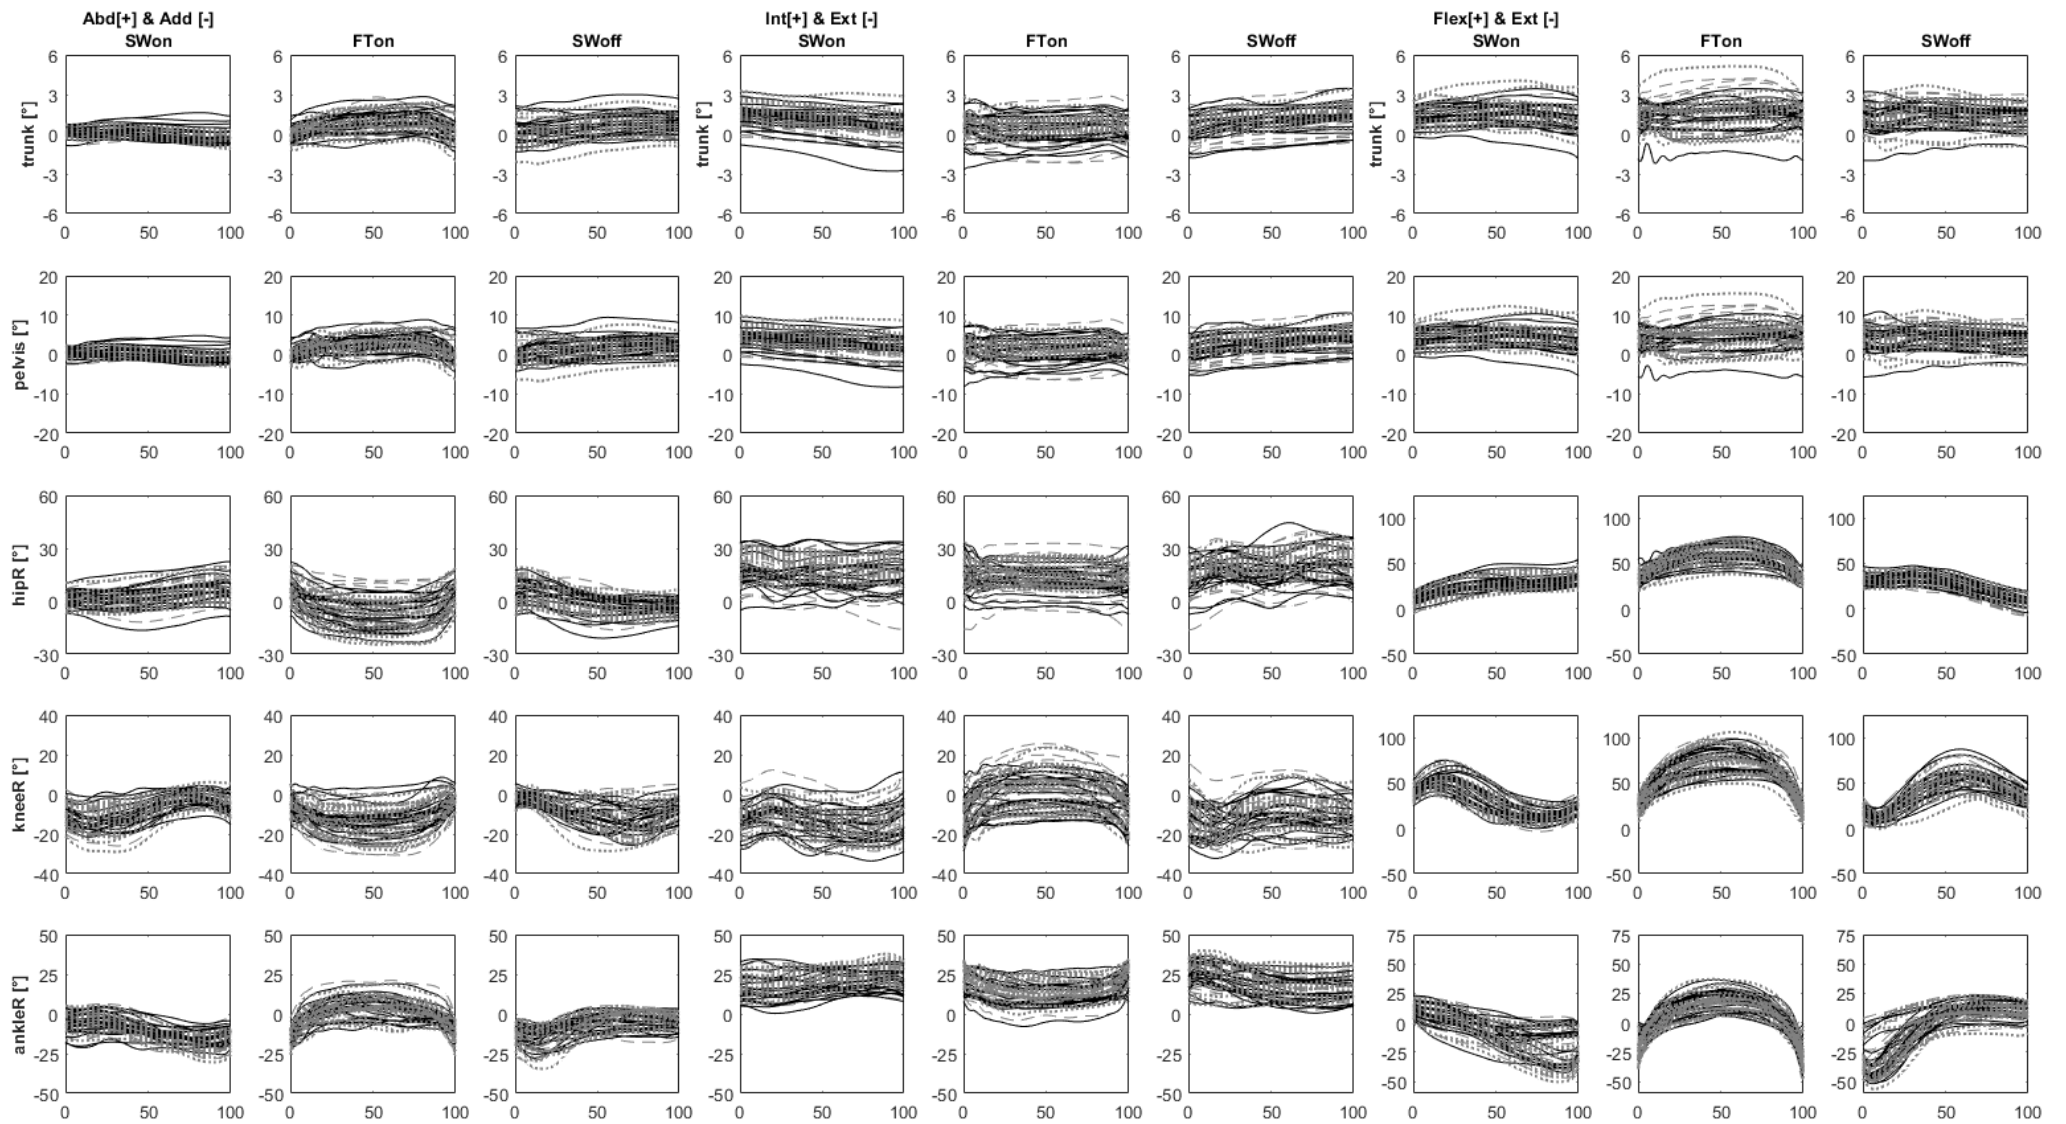

Figure S7: Waveforms of the forward lunge task of all participants (n=20) from the trunk, pelvis, hip, knee and ankle, abd-adduction, int-external rotation and flexion-extension angles during the swing towards foot contact (SWon), foot contact on the ground (FTon) and swing backwards (SWoff), from the three sessions: day1-operator1 (solid); day1-operator2 (striped); day2-operator1 (dotted).

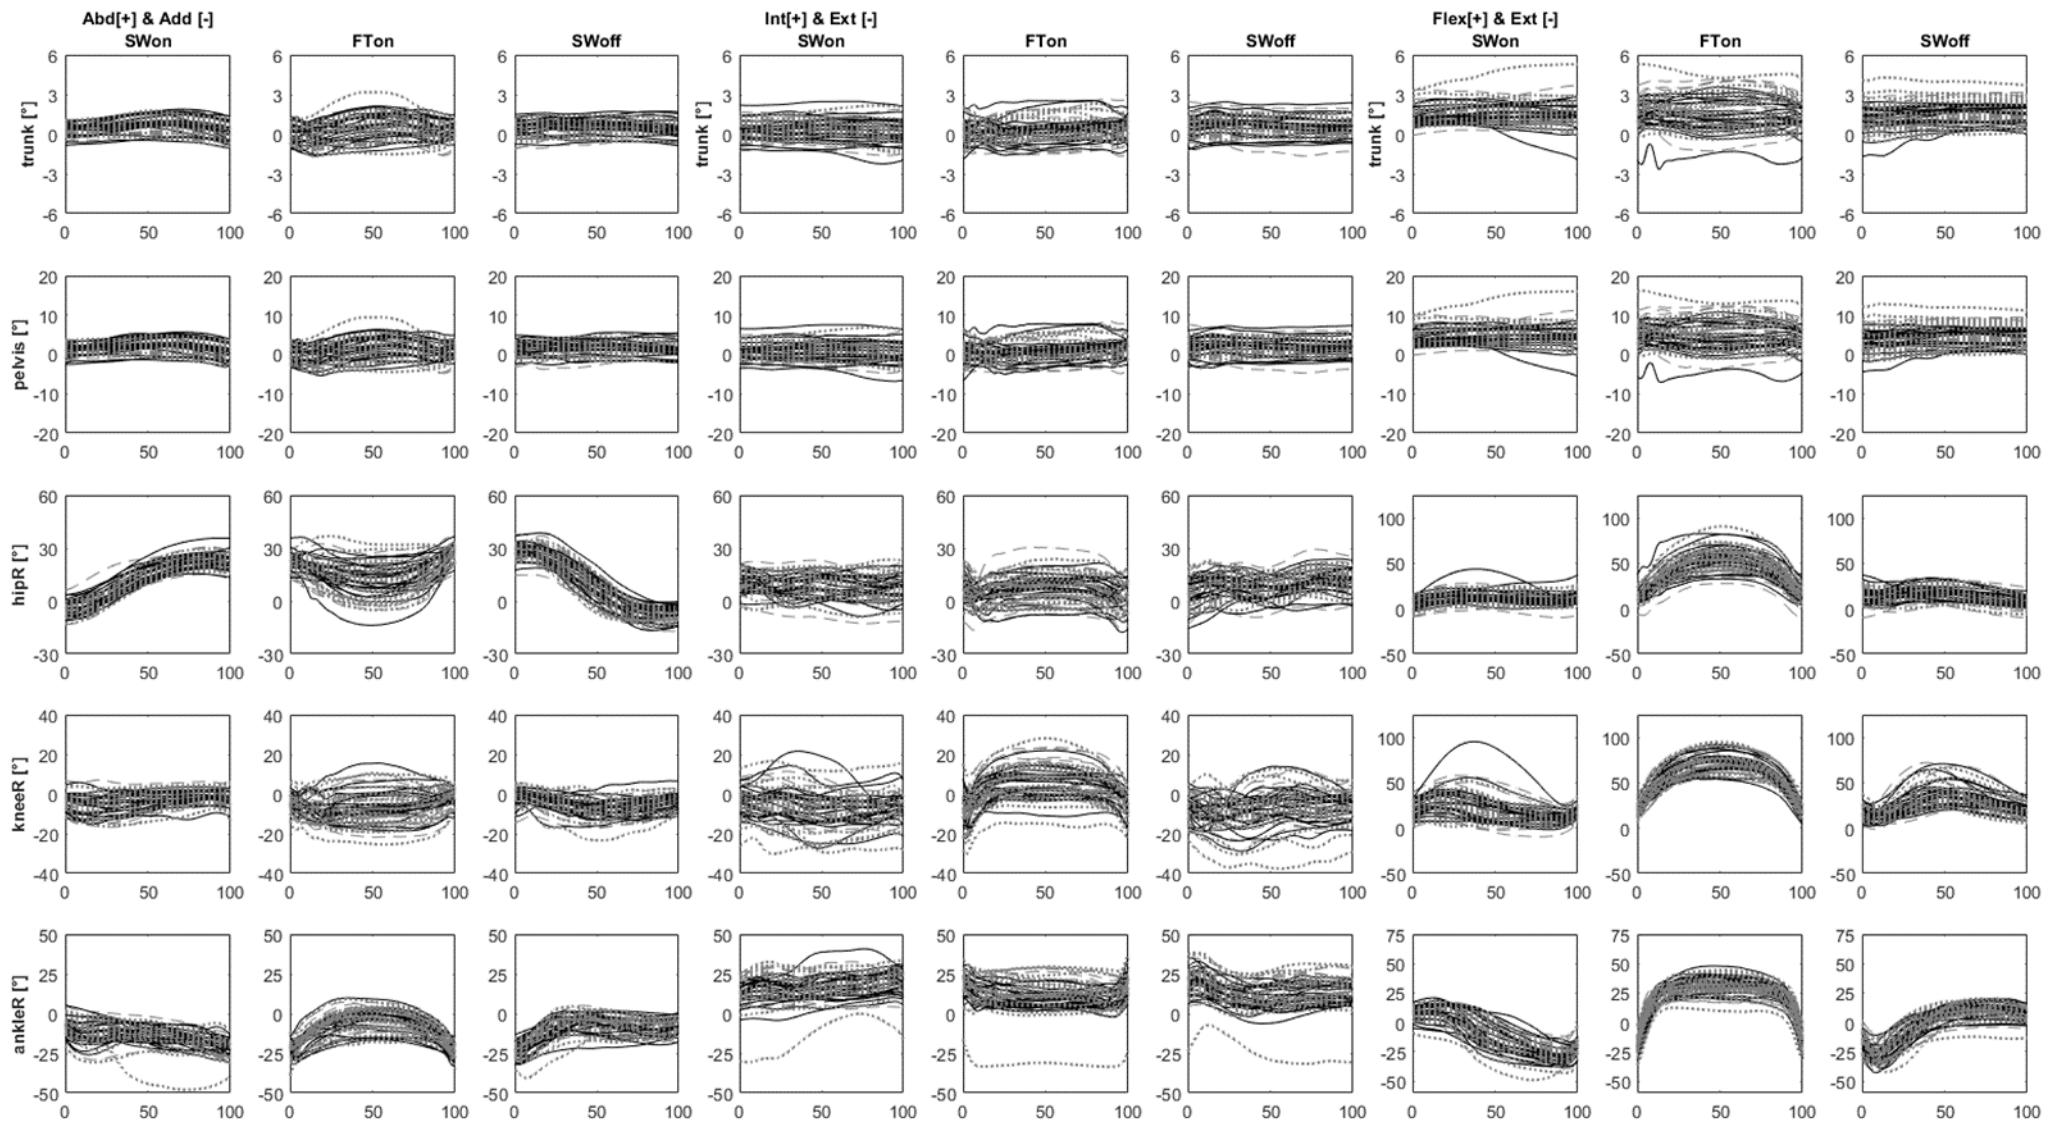

Figure S8: Waveforms of the sideward lunge task of all participants (n=20) from the trunk, pelvis, hip, knee and ankle, abd-adduction, int-external rotation and flexion-extension angles during the swing towards foot contact (SWon), foot contact on the ground (FTon) and swing backwards (SWoff), from the three sessions: day1-operator1 (solid); day1-operator2 (striped); day2-operator1 (dotted).



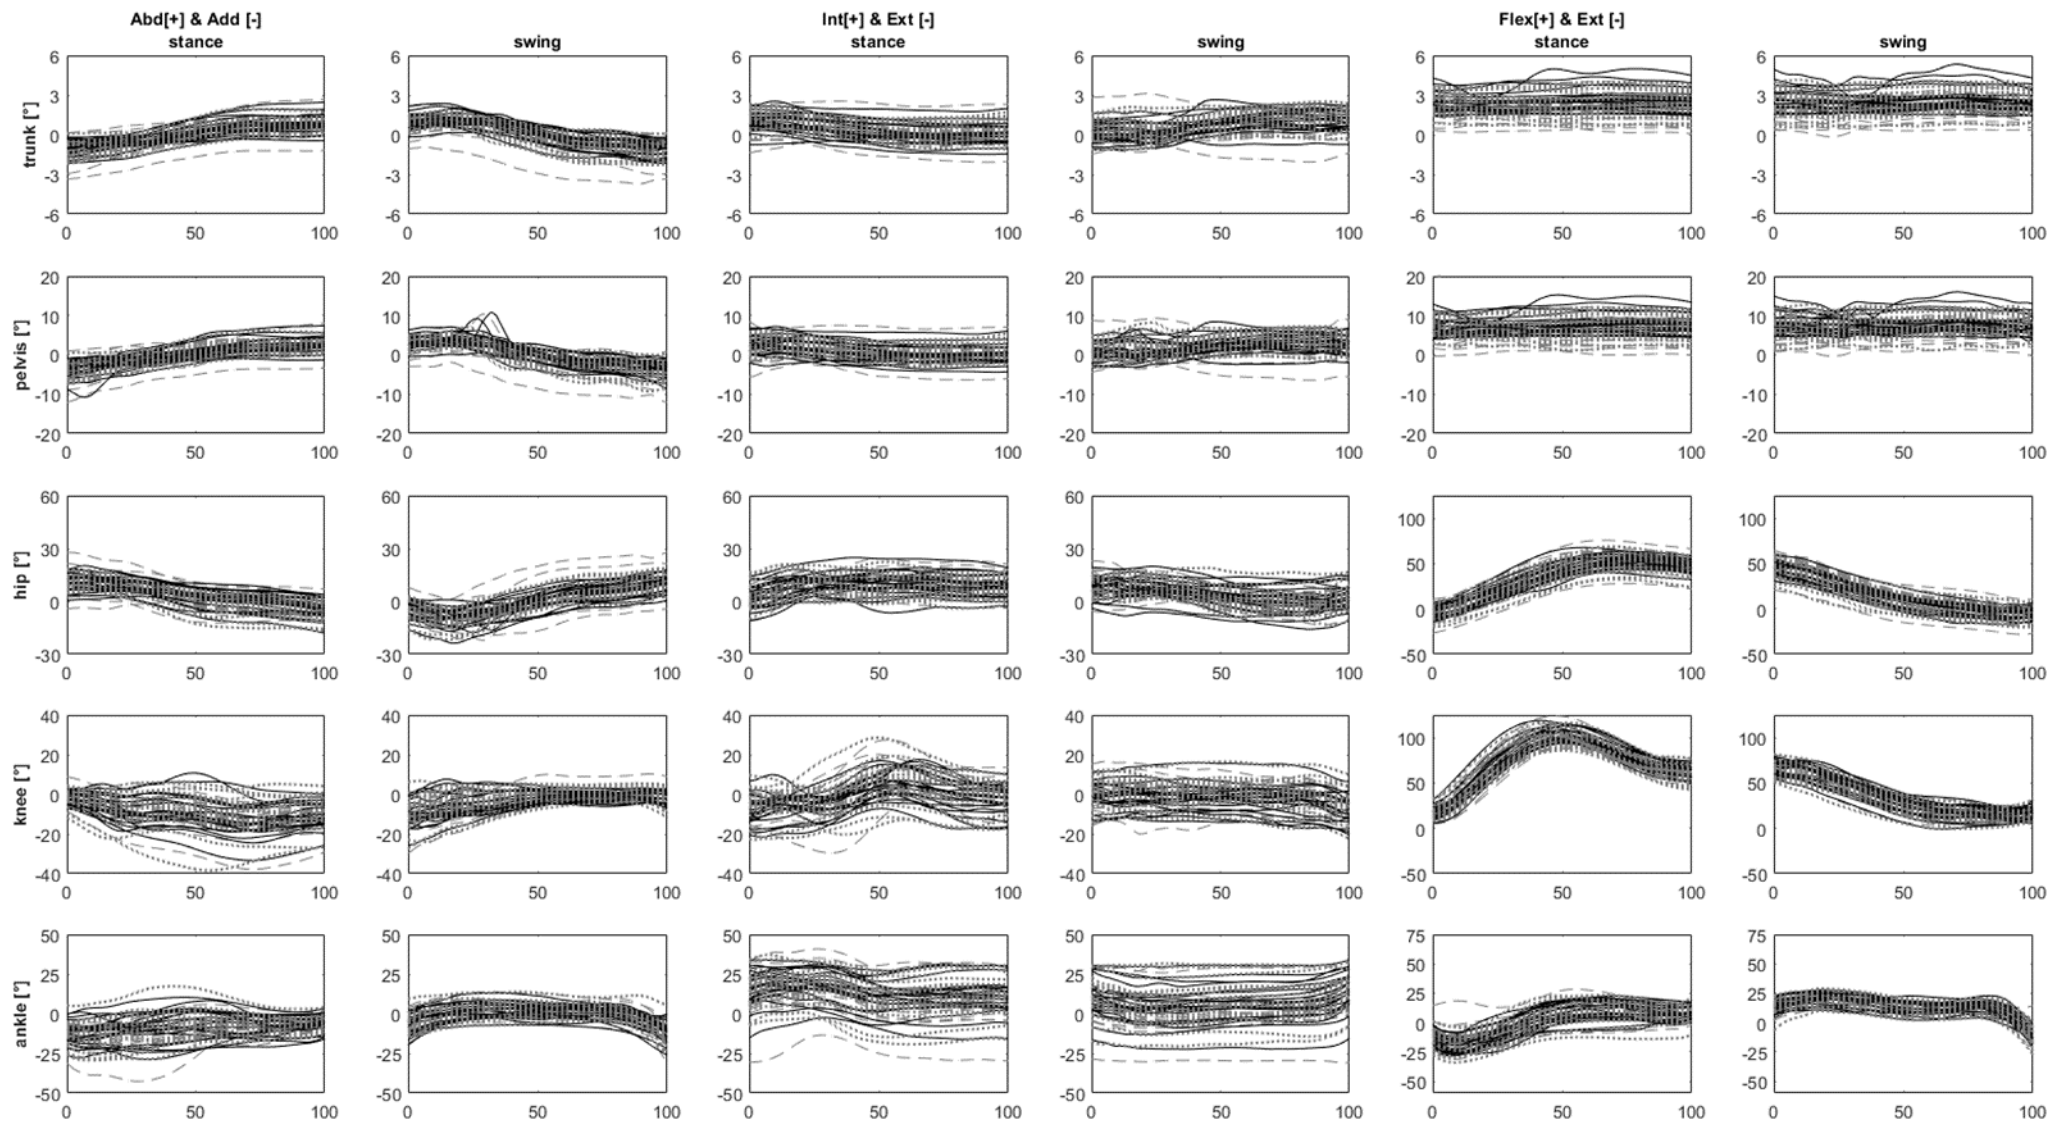

Figure S9: Waveforms of the upstairs task of all participants (n=20) from the trunk, pelvis, hip, knee and ankle, abd-adduction, int-external rotation and flexion-extension angles during swing and stance phases, from the three sessions: day1-operator1 (solid); day1-operator2 (striped); day2-operator1 (dotted).

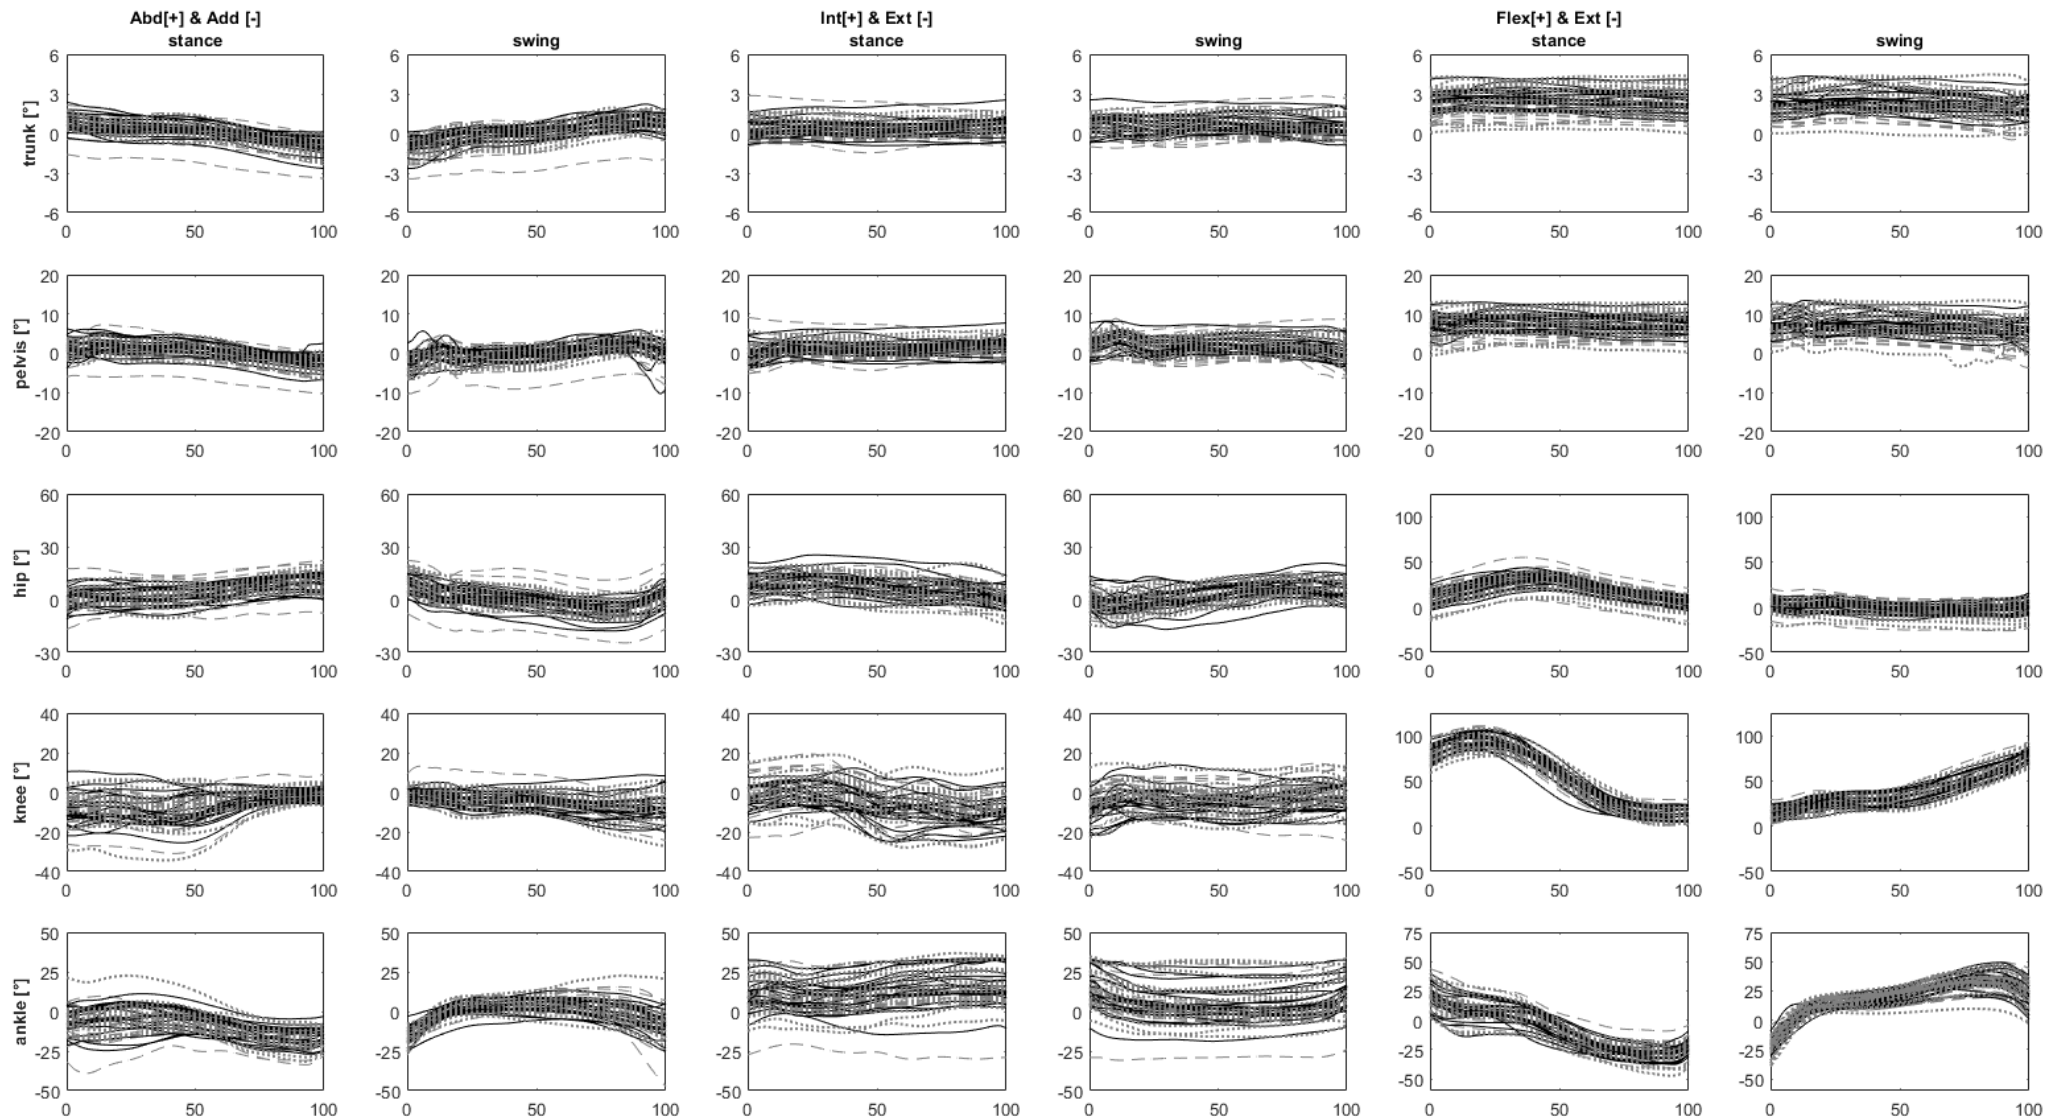

Figure S10: Waveforms of the downstairs task of all participants (n=20) from the trunk, pelvis, hip, knee and ankle, abd-adduction, int-external rotation and flexion-extension angles during swing and stance phases, from the three sessions: day1-operator1 (solid); day1-operator2 (striped); day2-operator1 (dotted).

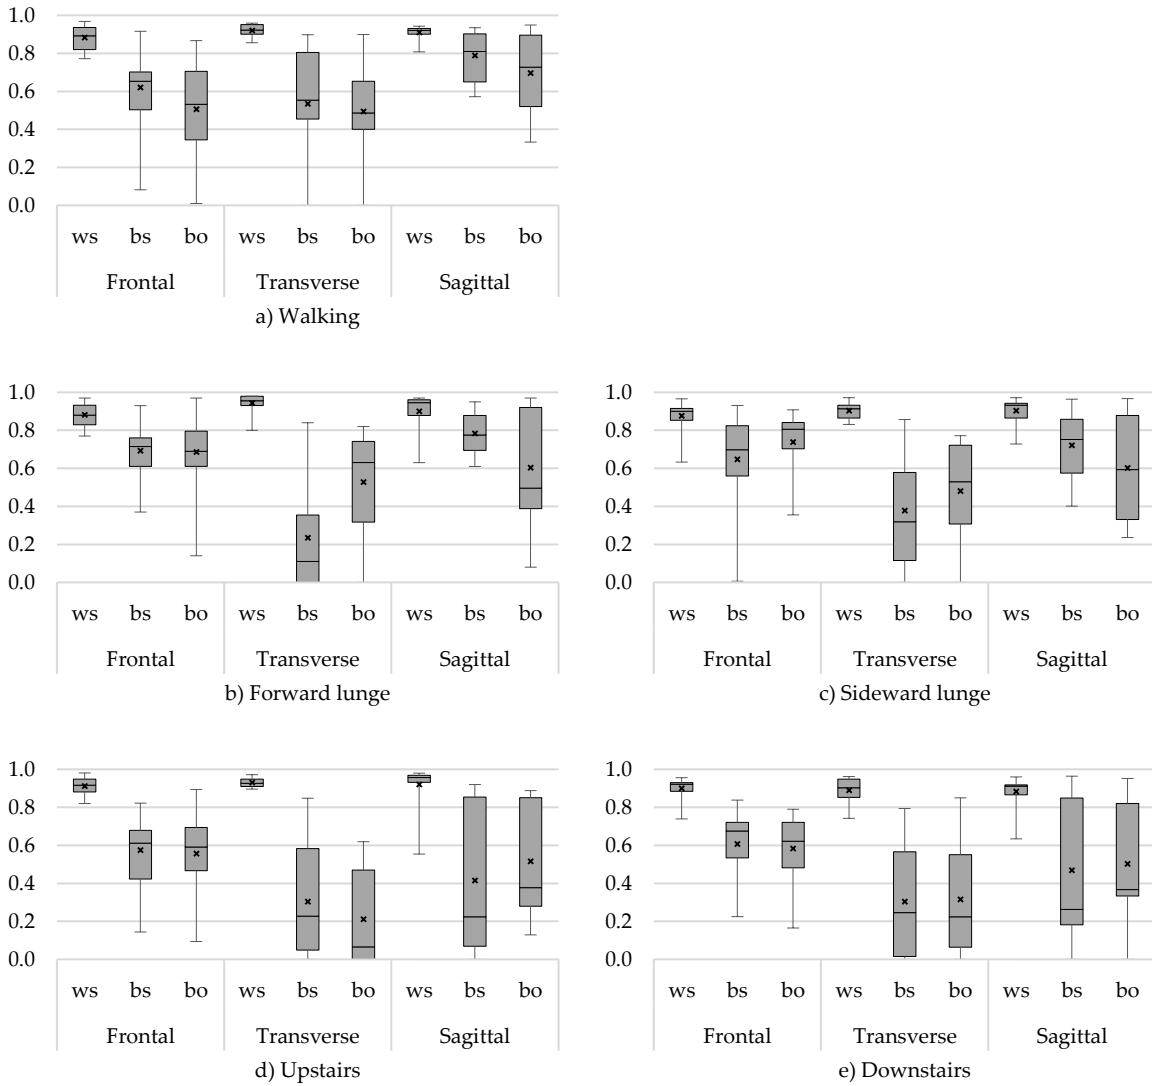

Figure S11: Comparison of the three levels of reliability from all angles and movement planes of (a) Walking, (b) Forward lunge, (c) Sideward lunge, (d) Upstairs and (e) Downstairs. With on the x-axis the within-session (ws), between-session (bs) and between-operator (bo) reliability in the frontal, transverse and sagittal plane and on the y-axis the ICC.
